1 **Article type:** Research article

2 **Title: Bundle sheath extensions affect leaf structural and physiological plasticity in**  
3 **response to irradiance**

4 **Authors:** Maria Antonia M. Barbosa<sup>1</sup>, Daniel H. Chitwood<sup>2</sup>, Aristéa A. Azevedo<sup>1</sup>, Wagner L.  
5 Araújo<sup>1,4</sup>, Dimas M. Ribeiro<sup>1</sup>, Lázaro E. P. Peres<sup>3</sup>, Samuel C. V. Martins<sup>1</sup>, Agustin Zsögön<sup>1\*</sup>

6 **Affiliations**

7 <sup>1</sup>*Departamento de Biologia Vegetal, Universidade Federal de Viçosa, CEP 36570-900, Viçosa,*  
8 *MG, Brazil*

9 <sup>2</sup>*Independent Researcher, Santa Rosa, CA 95409 USA*

10 <sup>3</sup>*Laboratory of Hormonal Control of Plant Development. Departamento de Ciências Biológicas,*  
11 *Escola Superior de Agricultura "Luiz de Queiroz", Universidade de São Paulo, CP 09, 13418-*  
12 *900, Piracicaba, SP, Brazil*

13 <sup>4</sup>*Max-Planck Partner group at the Departamento de Biologia Vegetal, Universidade Federal de*  
14 *Viçosa, 36570-900, Viçosa, MG, Brazil.*

15

16 **Running title:** Bundle sheath extensions influence leaf plasticity

17

18 **Corresponding author:**

19 Agustin Zsögön

20 Universidade Federal de Viçosa, Brazil

21 Phone: +55 31 3899 2592

22 Fax: +55 31 3899 4139

23 agustin.zsogon@ufv.br

24

25 **Abstract**

26

27 Coordination between structural and physiological traits is key to plants' responses to  
28 environmental fluctuations. In heterobaric leaves, bundle sheath extensions (BSEs) increase  
29 photosynthetic performance (light-saturated rates of photosynthesis,  $A_{\max}$ ) and water transport  
30 capacity (leaf hydraulic conductance,  $K_{\text{leaf}}$ ). However, it is not clear how BSEs affect these and  
31 other leaf developmental and physiological parameters in response to environmental conditions.  
32 The *obscuravenosa (obv)* mutation, found in many commercial tomato varieties, leads to absence

33 of BSEs. We examined structural and physiological traits of tomato heterobaric and homobaric  
34 (*obv*) near-isogenic lines (NILs) grown at two different irradiance levels.  $K_{\text{leaf}}$ , minor vein  
35 density and stomatal pore area index decreased with shading in heterobaric but not in homobaric  
36 leaves, which show similarly lower values in both conditions. Homobaric plants, on the other  
37 hand, showed increased  $A_{\text{max}}$ , leaf intercellular air spaces and mesophyll surface area exposed to  
38 intercellular airspace ( $S_{\text{mes}}$ ) in comparison with heterobaric plants when both were grown in the  
39 shade. BSEs further affected carbon isotope discrimination, a proxy for long-term water-use  
40 efficiency. BSEs confer plasticity in traits related to leaf structure and function in response to  
41 irradiance levels and might act as a hub integrating leaf structure, photosynthetic function and  
42 water supply and demand.

43

44 **Summary statement:** The presence of bundle sheath extension (BSEs) defines leaves as  
45 heterobaric, as opposed to homobaric leaves that lack them. Multiple functions have been  
46 proposed for BSEs, but their impact on different environmental conditions is still unclear. Here,  
47 we compared a tomato (*Solanum lycopersicum*) homobaric mutant lacking BSEs with its  
48 corresponding heterobaric wild-type, grown under two irradiance conditions. We show that the  
49 presence of BSEs differentially alters various physiological and anatomical parameters in  
50 response to growth irradiance. We propose that BSEs could act as hubs coordinating leaf  
51 plasticity in response to environmental factors.

52

53 **Key words:** leaf hydraulics, Micro-Tom, mutant, *obscuravenosa*, tomato, *Solanum*  
54 *lycopersicum*, plasticity, leaf development, shading, adaptation

55

## 56 **Introduction**

57 Leaves are the evolutionary solution to maximize light capture and optimize CO<sub>2</sub> and  
58 water vapour exchange with the atmosphere in land plants. Leaf biochemistry and structure are,  
59 therefore, strongly coordinated with photosynthetic performance and hydraulic function.  
60 Whereas such coordination is of paramount importance for plant growth and ecological  
61 distribution (Nicotra *et al.* 2008; Nicotra *et al.* 2011), it also requires a degree of developmental

62 plasticity to cope with environmental variation given the sessile nature of plants (Schlichting  
63 1986; Valladares *et al.* 2007). The light environment can be highly variable and dynamic, being  
64 particularly effective at influencing leaf structure and function (Terashima *et al.* 2001; Terashima  
65 *et al.* 2006). Leaf anatomy, in turn, can influence CO<sub>2</sub> and H<sub>2</sub>O exchanges with the atmosphere  
66 (Evans & Poorter 2001; Scoffoni *et al.* 2015). Optimality theory predicts that, under a given set  
67 of conditions, all parameters will tend to converge to maximize photosynthesis with the available  
68 resources, mainly light, nitrogen and water (Niinemets 2012 and references therein).

69 Rubisco activity, capacity for ribulose-1,5-bisphosphate regeneration and triose-  
70 phosphate export from chloroplasts are key biochemical determinants of net photosynthesis rate  
71 (*A*). Photosynthetic carbon assimilation, however, depends not only on the biochemistry of the  
72 leaf, but also on its diffusive properties which are strongly dependent on anatomy and  
73 morphology (Terashima, Hanba, Tholen & Niinemets 2011; Nunes-Nesi *et al.* 2016). Strong  
74 correlations with *A* have been found for stomatal distribution between the adaxial and abaxial  
75 faces (*i.e.* amphistomatous or hypostomatous leaves), blade thickness, leaf mass per area, the  
76 palisade-to-spongy mesophyll ratio, and the area of mesophyll and chloroplast surfaces facing  
77 the intercellular air spaces (Niinemets & Sack 2006). All of these parameters are highly plastic in  
78 response to light (Oguchi *et al.* 2003; Oguchi *et al.* 2005; Terashima *et al.* 2011) and potentially  
79 affect how water transport and evaporation occur in the leaf (Sack *et al.* 2003; Sack & Frole  
80 2006). The efficiency of water transport through the leaf is measured as  $K_{\text{leaf}}$  (leaf hydraulic  
81 conductance) (Sack & Holbrook 2006), which has been shown highly dynamic and able to vary  
82 rapidly with time of day, irradiance, temperature, and water availability (Prado & Maurel 2013).  
83 Leaf structural traits such as blade thickness, stomatal pore area, lamina margin dissection,  
84 among others, have been shown to influence  $K_{\text{leaf}}$  (Sack & Holbrook 2006).

85 In particular, vein structure and patterning play a critical role in determining both carbon  
86 assimilation rate (McAdam *et al.* 2017) and water distribution within plants (Sack *et al.* 2012).  
87 Water flow through the leaf occurs via xylem conduits within the vascular bundles, which upon  
88 entering the lamina from the petiole, rearrange into major and minor veins. Upon leaving the  
89 xylem, water has to transit through the bundle sheath, a layer of compactly arranged  
90 parenchymatic cells surrounding the vasculature (Trifiló, Raimondo, Savi, Lo Gullo & Nardini  
91 2016; Scoffoni *et al.* 2017). Bundle sheaths could behave as flux sensors or ‘control centers’ of

92 leaf water transport, and they are most likely responsible for the high dependence of  $K_{\text{leaf}}$  on  
93 temperature and irradiance (Leegood 2008; Ohtsuka *et al.* 2018). Vertical layers of colorless  
94 cells connecting the vascular bundle to the epidermis are present in many eudicotyledons (Esau  
95 1977). These so-called bundle sheath extensions (BSEs) are most commonly found in minor  
96 veins, but can occur in veins of any order depending on the species (Wylie 1943; Wylie 1952). A  
97 topological consequence of the presence of BSEs is the formation of compartments in the  
98 lamina, which restricts lateral gas flow and thus allows compartments to maintain gas exchange  
99 rates independent of one another (Pieruschka, Schurr, Jensen, Wolff & Jahnke 2006; Morison,  
100 Lawson & Cornic 2007; Buckley, Sack & Gilbert 2011). Such leaves, and by extension the  
101 species possessing them, are therefore called ‘heterobaric’, as opposed to ‘homobaric’ species  
102 lacking BSEs (Neger 1918).

103         Large taxonomic surveys have demonstrated that heterobaric species tend to occur more  
104 frequently in sunny and dry sites or in the upper stories of climax forests (Kenzo *et al.* 2007), so  
105 it was hypothesized that BSEs could fulfill an ecological role by affecting mechanical and  
106 physiological parameters in the leaf (Terashima 1992). Despite some proposed functions for  
107 BSEs (mechanical support, increased damage resistance, among others) remain hypothetical  
108 (Lawson & Morison 2006; Read & Stokes 2006), other functions have been proven through  
109 meticulous experimental work, suggesting that the existence of BSEs could be adaptive (Buckley  
110 *et al.* 2011). For instance, lateral propagation of ice in the lamina was precluded by the  
111 sclerenchymatic BSEs in *Cinnamomum canphora* L, although this effect has only hitherto been  
112 described in this species and could depend on the type and amount of BSEs in the leaf blade  
113 (Hacker & Neuner 2007). Hydraulic integration of the lamina was increased by BSEs, which  
114 connect the vascular bundle to the epidermis and, therefore, reduce the resistance in the water  
115 path between the supply structures (veins) and the water vapor outlets (stomata) (Zwieniecki *et*  
116 *al.* 2007). Lastly,  $A$  was increased in leaves with BSEs, due to their optimization of light  
117 transmission within the leaf blade (Karabourniotis *et al.* 2000; Nikolopoulos *et al.* 2002).

118         We have previously characterized a homobaric mutant that lacks BSEs in the otherwise  
119 heterobaric species tomato (*Solanum lycopersicum* L.) (Zsögön *et al.* 2015). The homobaric  
120 mutant *obscuravenosa* (*obv*) reduces  $K_{\text{leaf}}$  and stomatal conductance but does not impact  $A_{\text{max}}$ ,  
121 nor global carbon economy of the plant. Here, we extend our observations to plants grown under

122 two contrasting irradiance levels, which are known to influence leaf structure (Oguchi *et al.*  
123 2003; Oguchi *et al.* 2005; Oguchi *et al.* 2006),  $A_{\max}$  (Evans & Poorter 2001; Shipley 2002) and  
124  $K_{\text{leaf}}$  (Scoffoni *et al.* 2008; Guyot *et al.* 2012; Scoffoni *et al.* 2015). We investigated whether the  
125 presence of BSEs could have an impact on the highly plastic nature of leaf development and  
126 function in response to different irradiance levels. We hypothesized that homobaric leaves,  
127 lacking a key physical feature that increases carbon assimilation and leaf hydraulic integration,  
128 would exhibit less plasticity in their response to environmental conditions than heterobaric  
129 leaves. By assessing a series of leaf structural and physiological parameters in tomato cultivar  
130 Micro-Tom (MT) and the near-isogenic *obv* mutant, we provide evidence of the potential role of  
131 BSEs in the coordination of leaf structure and hydraulics in response to growth irradiance.  
132 Finally, we analysed whether dry mass accumulation and tomato fruit yield are affected by the  
133 presence of BSEs and irradiance in two different tomato genetic backgrounds (cultivars MT and  
134 M82). We discuss the potential role of BSEs in the coordination of leaf structure and function in  
135 response to the light environment.

136

## 137 **Materials and Methods**

### 138 *Plant material and experimental setup*

139 Seeds of the tomato (*Solanum lycopersicum* L.) cv Micro-Tom (MT) and cv M82 were  
140 donated by Dr Avram Levy (Weizmann Institute of Science, Israel) and the Tomato Genetics  
141 Resource Center (TGRC, Davis, University of California, CA, USA), respectively. The  
142 introgression of the *obscuravenosa* (*obv*) into the MT genetic background to generate a near-  
143 isogenic line (NIL) was described previously (Carvalho *et al.* 2011). The model tomato M82  
144 cultivar harbors the *obv* mutation, so the experiments were performed on F1 lines obtained by  
145 crosses between MT and M82. Both F1 lines have 50% MT and 50% M82 genome complement,  
146 differing only in the presence or absence of BSEs (described in Table 1). Data were obtained  
147 from two independent assays, similar results were found both times. Plants were grown in a  
148 greenhouse in Viçosa (642 m asl, 20° 45' S; 42° 51' W), Minas Gerais, Brazil, under semi-  
149 controlled conditions. Micro-Tom (MT) background plants were grown during the months of  
150 May to August of 2016 in temperature of 24/20°C, 13/11h (day/night) photoperiod. Plants in the  
151 M82 background were cultivated during the months of September to December of 2016 with

152 temperature of 26/22°C, 12/12h (day/night) photoperiod. Plant cultivation was carried out as  
153 described previously (Silva *et al.* 2018). The experiments were conducted in completely  
154 randomized experimental design, in 2×2 factorial, consisting of two genotypes, and two  
155 irradiance levels (sun and shade). Plants in the ‘sun’ treatment were exposed to greenhouse  
156 conditions, with midday irradiance of ~900  $\mu\text{mol photons m}^{-2} \text{s}^{-1}$ . For the ‘shade’ treatment  
157 plants were maintained on a separate bench covered with neutral shade cloth, with a retention  
158 capacity of 70% of sunlight (250-300  $\mu\text{mol photons m}^{-2} \text{s}^{-1}$ ).

159

### 160 *Plant morphology determinations*

161 Morphological characterization was performed in MT plants 50 days after germination as  
162 described (Vicente *et al.* 2015). Specific leaf area (SLA) was calculated through the relationship  
163 between leaf area (LA) and dry mass (LDW), as described by the equation  $\text{SLA (cm}^2 \text{g}^{-1}) =$   
164  $\text{LA/LDW}$ .

165 Leaflet outline shape was analysed as described in Chitwood *et al.* 2015. Briefly, leaflet  
166 outlines were thresholded using ImageJ (Abramoff *et al.* 2004) and converted to .bmp files for  
167 analysis in SHAPE (Iwata & Ukai 2002), where each leaflet was converted into chaincode,  
168 oriented, and decomposed into harmonic coefficients. The harmonic coefficients were then  
169 converted into a data frame format and read into R (R Core Team 2018). The Momocs package  
170 (Bonhomme *et al.* 2014) was used to visualize mean leaflet shapes from each genotype/light  
171 treatment combination. The `prcomp()` function was used to perform a Principal Component  
172 Analysis (PCA) on only A and D harmonics so that only symmetric (rather than asymmetric)  
173 shape variance was considered (Iwata *et al.* 1998). The results were visualized using `ggplot2`  
174 (Wickham 2016).

175

### 176 *Light microscopy analyses*

177 The fully expanded fifth leaf was cleared with 95% methanol for 48h followed by 100%  
178 lactic acid. Stomatal pore area index (SPI) was calculated as  $(\text{guard cell length})^2 \times \text{stomatal}$   
179  $\text{density}$  for the adaxial and abaxial epidermes and then added up (Sack *et al.* 2003). Stomatal  
180 density was calculated as number of stomata per unit leaf area, stomatal index as the proportion

181 of guard cells to total epidermal cells. Minor vein density was measured as length of minor veins  
182 (<0.05  $\mu\text{m}$  diameter) per unit leaf area.

183 For cross-sectional analyses, samples were collected from the medial region of the fully  
184 expanded fifth leaf and fixed in 70% formalin-acetic acid-alcohol (FAA) solution for 48h and  
185 then stored in 70% (v/v) aqueous ethanol. The samples were embedded in historesin (Leica  
186 Microsystems, Wetzlar, Germany), cut into cross-sections (5 $\mu\text{m}$ ) with an automated rotary  
187 microtome (RM2155, Leica Microsystems, Wetzlar, Germany) and sequentially stained with  
188 toluidine blue. Images obtained in a light microscope (Zeiss, Axioscope A1 model, Thornwood,  
189 NY, USA) with attached Axiovision® 105 color image capture system. Anatomical parameters  
190 were quantified using Image Pro-Plus® software (version 4.5, Media Cybernetics, Silver Spring,  
191 USA).

192 Mesophyll surface area exposed to intercellular air spaces per leaf area ( $S_{mes}/S$ ) was  
193 calculated separately for spongy and palisade tissues as described by Evans et al. (1994). To  
194 convert the length in cross-sections to the surface area, a curvature correction factor was  
195 measured and calculated for each treatment according to Thain (1983) for palisade and spongy  
196 cells by measuring their width and height and calculating an average width/height ratio. The  
197 curvature factor correction ranged from 1.17 to 1.27 for spongy cells and from 1.38 to 1.45 for  
198 palisade cells. All parameters were analysed at least in four different fields of view.  $S_m/S$  was  
199 calculated as an weighted average based on tissue volume fractions.

200

#### 201 *Anatomical estimation of mesophyll conductance ( $g_m$ )*

202 The one-dimensional gas diffusion model of Niinemets & Reichstein (2003) as applied by  
203 Tosens et al. (2012) was employed to estimate the share of different leaf anatomical  
204 characteristics in determining mesophyll conductance ( $g_m$ ).  $g_m$  as a composite conductance for  
205 within-leaf gas and liquid components is given by:

206

$$207 \quad g_m = \frac{1}{\frac{1}{g_{\text{ias}}} + \frac{RT_k}{H \cdot g_{\text{liq}}}} \quad (\text{Eqn 1}),$$

208



209 where  $g_{ias}$  is the gas phase conductance inside the leaf from substomatal cavities to outer surface  
210 of cell walls,  $g_{liq}$  is the conductance in liquid and lipid phases from outer surface of cell walls to  
211 chloroplasts,  $R$  is the gas constant ( $8.314 \text{ Pa m}^3 \text{ K}^{-1} \text{ mol}^{-1}$ ),  $T_k$  is the absolute temperature (K),  
212 and  $H$  is the Henry's law constant ( $2938.4 \text{ Pa m}^3 \text{ mol}^{-1}$ ).  $g_m$  is defined as a gas-phase  
213 conductance, and thus  $H/(RT_k)$ , the dimensionless form of Henry's law constant, is needed to  
214 convert  $g_{liq}$  to corresponding gas-phase equivalent conductance (Niinemets & Reichstein 2003).  
215 In the model, the gas-phase conductance (and the reciprocal term,  $r_{ias}$ ) is determined by average  
216 gas-phase thickness,  $\Delta L_{ias}$ , and gas-phase porosity,  $f_{ias}$  (fraction of leaf air space):

217

$$218 \quad g_{ias} = \frac{1}{r_{ias}} = \frac{D_a \cdot f_{ias}}{\Delta L_{ias} \cdot \zeta} \quad (\text{Eqn 2}),$$

219

220 where  $\zeta$  is the diffusion path tortuosity ( $1.57 \text{ m m}^{-1}$ , value taken from Niinemets & Reichstein  
221 (2003) and  $D_a$  ( $\text{m}^2 \text{ s}^{-1}$ ) is the diffusion coefficient for  $\text{CO}_2$  in the gas phase ( $1.51 \times 10^{-5}$  at  $25 \text{ }^\circ\text{C}$ ).  
222  $\Delta L_{ias}$  was taken as half the mesophyll thickness.

223

$$224 \quad g_{liq} = \frac{S_m}{(r_{cw} + r_{pl} + r_{cyt} + r_{en} + r_{st})S}$$

224

225 The term  $r_i$ , where  $i$  stands either for cell wall (cw), plasma membrane (pl), cytosol (cyt),  
226 chloroplast envelope (en), and stroma (st) resistances are the partial determinants of the liquid-  
227 phase diffusion pathway. Cell wall thickness is the main determinant of liquid-phase resistance,  
228 and, as we found little variation for this parameter when comparing two studies conducted under  
229 different conditions (Berghuijs *et al.* 2015; Eid Gamel, Elsayed, Bashasha & Haroun 2016) we  
230 used the partial determinants of the liquid-phase diffusion pathway described in Berghuijs *et al.*  
231 (2015). In addition,  $S_{mes}/S$ , a major determinant of  $g_{liq}$ , was measured in this study. Total liquid-  
232 phase diffusion was scaled by the  $S_{mes}/S$  as there was little cell wall area free of chloroplasts  
233 (Figure S3) reflecting a ratio between chloroplast and mesophyll area exposed to intercellular  
234 airspaces ( $S_c/S_{mes}$ ) very close to 1.0 as also observed by Galmés *et al.* (2013).

235

236 *Carbon isotope composition*



237 The fully expanded fifth leaf of five plants per treatment were harvested and ground to  
238 fine powder. Samples were sent to the Laboratory of Stable Isotopes (CENA, USP, Piracicaba,  
239 Brazil), where they were analysed for  $^{13}\text{C}/^{12}\text{C}$  ratio using a mass spectrometer coupled to a  
240 Dumas elemental analyser ANCA-SL (Europa Scientific, Crewe, UK). Carbon isotope ratios  
241 were obtained in  $\delta$ -notation, where

$$242 \quad \delta = \left( \frac{R}{R_{\text{standard}}} \right) - 1 \quad (\text{Eqn 3,})$$

243 and  $R$  and  $R_{\text{standard}}$  are the isotope ratios of the plant sample and the Vienna Pee Dee Belemnite  
244 (VPDB) standard, respectively.  $\delta^{13}\text{C}$  of atmospheric  $\text{CO}_2$  was assumed to be  $-8$  per mil. The  
245  $\delta^{13}\text{C}$  values for the samples were then converted to carbon isotopic discrimination values,  $\Delta^{13}\text{C} =$   
246  $(\delta_a - \delta_p)/(1 + \delta_p)$ , where  $\delta_a$  is the  $\delta^{13}\text{C}$  of atmospheric  $\text{CO}_2$  and  $\delta_p$  the  $\delta^{13}\text{C}$  of the plant material  
247 (Farquhar and Sharkey 1982).

248

#### 249 *Gas exchange and chlorophyll fluorescence determinations*

250 Gas exchange analyses were performed in MT and M82 plants at 40 and 50 days after  
251 germination, respectively. Gas exchange measurements were performed using an open-flow gas  
252 exchange system infrared gas analyzer (IRGA) model LI-6400XT (LI-Cor, Lincoln, NE, USA).  
253 The analyses were performed under common conditions for photon flux density ( $1000 \mu\text{mol m}^{-2}$   
254  $\text{s}^{-1}$ , from standard LiCor LED source), leaf temperature ( $25 \pm 0.5^\circ\text{C}$ ), leaf-to-air vapor pressure  
255 difference ( $16.0 \pm 3.0$  mbar), air flow rate into the chamber ( $500 \mu\text{mol s}^{-1}$ ) and reference  $\text{CO}_2$   
256 concentration of 400 ppm (injected from a cartridge), using an area of  $2 \text{ cm}^2$  in the leaf chamber.  
257 For dark respiration ( $R_d$ ) determination, plants were adapted to the dark at least 1h before the  
258 measurements, as described by Niinemets *et al.* 2006.

259 Photochemical efficiency of photosystem II ( $\phi\text{PSII}$ ) was determined by measuring the  
260 steady-state fluorescence ( $F_s$ ) and the maximum fluorescence ( $F_m'$ ), using a pulse of saturating  
261 light of approximately  $8000 \mu\text{mol photons m}^{-2} \text{ s}^{-1}$ , as described by Genty *et al.* 1989.  
262 Photosynthetic light response curves were measured under ambient  $\text{O}_2$ , with reference  $\text{CO}_2$  set to  
263  $400 \mu\text{mol mol}^{-1}$ . After allowing full photosynthetic induction for 30-45 min,  $A$  was determined at  
264  $\text{PPFD}$  steps 1500, 1200, 1000, 800, 600, 400, 300, 200, 150, 75, 50, 0  $\mu\text{mol m}^{-2} \text{ s}^{-1}$  at ambient  
265 temperature ( $25^\circ\text{C}$ ) and  $\text{CO}_2$  concentration ( $400 \mu\text{mol mol}^{-1}$ ) The light saturation point ( $I_s$ ), light

266 compensation point ( $I_c$ ), light saturation CO<sub>2</sub> assimilation rate ( $A_{PPFD}$ ) and the light utilization  
267 ( $1/\Phi$ ).  $A/C_i$  curves were constructed with step changes (50, 100, 150, 250, 400, 500, 700, 900,  
268 1200, 1300, 1400 and 1600  $\mu\text{mol mol}^{-1}$ ) of  $[\text{CO}_2]$  under 1000  $\mu\text{mol m}^{-2} \text{s}^{-1}$  light, at 25°C under  
269 ambient O<sub>2</sub> supply. The maximum rate of carboxylation ( $V_{c\text{max}}$ ), maximum rate of carboxylation  
270 limited by electron transport ( $J_{\text{max}}$ ) and triose-phosphate utilization (TPU) were estimated by  
271 fitting the mechanistic model of CO<sub>2</sub> assimilation proposed by Farquhar *et al.* 1980.  
272 Additionally,  $g_m$  was tentatively estimated using the Ethier and Livingston (2004) method, which  
273 is based on fitting  $A/C_i$  curves with a non-rectangular hyperbola version of the FvCB which  
274 incorporates  $g_m$  in the model. Corrections for the leakage of CO<sub>2</sub> into and out of the leaf chamber  
275 of the LI-6400 were applied to all gas-exchange data as described by Rodeghiero *et al.* 2007  
276 using a  $K_{\text{CO}_2}$  estimated as 0.4  $\mu\text{mol s}^{-1}$

277

#### 278 *Water relations*

279 Leaf ( $\Psi_L$ ) or xylem ( $\Psi_X$ ) water potential were measured in the central leaflet of the fifth  
280 fully expanded leaf in MT and M82 plants 40 and 50 days of age, respectively, using a  
281 Scholander-type pressure chamber (model 1000, PMS Instruments, Albany, NY, USA).  $\Psi_L$  was  
282 measured in transpiring leaves, whereas  $\Psi_X$  was obtained from non-transpiring leaflets, assumed  
283 to be in equilibrium with the petiole water potential. The non-transpiring leaflet consisted of the  
284 lateral leaflet of the same leaf, which was covered with plastic film and foil the night before the  
285 measurements. Apparent hydraulic conductance ( $K_{\text{leaf}}$ ) were estimated using the transpiration  
286 rates and the water potential difference between the transpiring and non-transpiring leaflet  
287 according to Ohm's law:

$$288 \quad K_{\text{leaf}} = \frac{E}{(\Psi_X - \Psi_L)} \quad (\text{Eqn 4}),$$

289 Where:  $E$  is the transpiration rate ( $\text{mmol m}^{-2} \text{s}^{-1}$ ) determined during gas exchange measurements,  
290 and  $(\Psi_L - \Psi_X)$  corresponds to the pressure gradient between the transpiring and non-transpiring  
291 leaflet (MPa). Water potential and hydraulic conductance measurements were performed  
292 immediately after gas exchange analysis.

#### 293 *Biochemical determinations*

294 Biochemical analyses of the leaves were performed in MT and M82 plants 40 and 50  
295 days after germination, respectively. The terminal leaflet of the sixth fully expanded leaf was  
296 collected around midday on a cloudless day, instantly frozen in liquid N<sub>2</sub> and stored at -80°C.  
297 Subsequently, the samples were lyophilized at -48°C and macerated with the aid of metal beads  
298 in a Mini-Beadbeater-96 type cell disrupter (Biospec Products, Bartlesville, OK, USA). A 10-mg  
299 sample of ground tissue was added to pure methanol (700 µL), and the mixture was incubated at  
300 70 °C for 30 min followed by a centrifugation (16,200 × g, 5 min). Supernatant was placed in  
301 new tubes in which was added chloroform and ultrapure water (375 µL and 600 µL,  
302 respectively). After new centrifugation (10,000 × g, 10 min), the concentrations of hexoses  
303 (glucose plus fructose) and sucrose were determined in the aqueous phase by a three step  
304 reaction in which hexokinase, phosphoglucose isomerase and invertase (Sigma Aldrich) were  
305 subsequently added to a reaction buffer containing ATP, NADH and glucose dehydrogenase  
306 (Sigma Aldrich) according to Fernie et al. (2001). The methanol-insoluble pellet was  
307 resuspended by adding 1mL 0.2M KOH followed by incubation at 95 °C. The resulted solution  
308 was used for subsequent protein quantification (Bradford method). Finally, 2M acetic acid was  
309 added (160 µL) to the resuspended pellet from which was quantified Starch by adding  
310 hexokinase in a buffer reaction as previously describe for sugars. Noteworthy, the above  
311 described protocol was previously detailed by Praxedes, DaMatta, Loureiro, G. Ferrão &  
312 Cordeiro 2006 and Ronchi *et al.* 2006 and includes some of the recommendations described by  
313 Quentin *et al.* 2015, such as the use of amyloglucosidase for starch extraction and the use of  
314 glucose and starch standards. Photosynthetic pigments (chlorophyll (a + b) content and  
315 carotenoids) were determined in the methanolic extract using the equations described in Porra et  
316 al. (1989) using a microplate reader.

### 317 *Agronomic parameters (yield and Brix)*

318 The number of fruits per plant was obtained from fruit counts and the frequency of green  
319 and mature fruits was also determined separately. Fruit average weight was determined after  
320 individual weighing of each fruit, using a semi analytical balance with a sensitivity of 0.01 g  
321 (AUY220, Shimadzu, Kyoto, Japan). Yield per plant corresponds to the total weight of fruits per  
322 plant. The determination of the soluble solids content (°Brix, which is the % of soluble solids by  
323 weight) in the fruits was measured with a digital temperature-compensated refractometer, model

324 RTD 45 (Instrutherm<sup>®</sup>, São Paulo, Brazil). Six ripe fruits per plant were evaluated in five  
325 replicates per genotype.

### 326 *Statistical analysis*

327 The data were subjected to analysis of variance (ANOVA) using Assistat version 7.6  
328 (<http://assistat.com>) and the means were compared by the Tukey test at the 5% level of  
329 significance ( $P \leq 0.05$ ).

330

## 331 **Results**

332 This study was performed on two tomato genetic backgrounds, cultivars Micro-Tom  
333 (MT) and M82, and their respective *obscuravenosa* (*obv*) mutant near-isogenic lines (NILs).  
334 First, we conducted a microscopic analysis of terminal leaflet cross-sections to confirm that, like  
335 all wild-type tomatoes and its wild relatives, MT harbors bundle sheath extensions (BSEs) in  
336 primary (*i.e.* midrib) and secondary veins of fully-expanded leaves (Fig. 1a). The *obv* mutant, on  
337 the other hand, lacks these structures, so that the veins appear obscure (hence the name of the  
338 genotype) (Fig. 1b). Chlorophyll fluorescence imaging revealed that this optical effect is due to  
339 the continuity of the palisade mesophyll on the adaxial side, and of the spongy mesophyll on the  
340 abaxial side in *obv*, which are both interrupted by BSEs in MT (Fig. 1c,d). The BSEs protrude  
341 toward the adaxial epidermis as columns of possibly parenchymatic or collenchymatic cells with  
342 thickened cell walls, whereas they thicken downward and are broadly based upon the lower  
343 epidermis (Fig. 1e-h). We next conducted a water + dye infiltration assay in the lamina, proving  
344 that, under similar pressure, intercellular spaces of the *obv* mutant were flooded almost twice  
345 (86.1% vs 47.3%,  $P=0.012$ ) as much as for MT (Fig. S1). Dry patches were observed in MT,  
346 which shows that the presence of BSEs in secondary veins creates physically isolated  
347 compartments in the lamina (Fig. S1). We therefore follow the established nomenclature of  
348 ‘heterobaric’ for MT and ‘homobaric’ for *obv*.

### 349 *Irradiance level alters leaf shape and structural parameters differentially in heterobaric and* 350 *homobaric leaves*

351 We began by conducting an analysis of leaflet shape between the treatments. A Principal  
352 Component Analysis (PCA) on harmonic coefficients contributing to symmetric shape variation

353 separates MT and *obv* genotypes, but failed to show large differences in shape attributable to  
354 light treatment (Fig 2a). To visualize the effects of genotype and light, we superimposed mean  
355 leaflet shapes from each genotype-light combination (Fig 2b). *obv* imparts a wider leaflet shape  
356 relative to MT, regardless of light treatment. Light treatment did not discernibly affect leaflet  
357 shape.

358 Sun leaves had reduced total specific leaf area (SLA) compared to shade leaves in both  
359 MT and the *obv* mutant (Fig 2c). Shading increased SLA values by 101% and 62% for MT and  
360 *obv* plants, respectively, when compared to plants in the sun treatment. Terminal leaflets of fully  
361 expanded MT sun leaves had 62% higher perimeter/area than MT shade leaves, unlike *obv* where  
362 we found no difference between irradiance levels (Fig 2d). Perimeter<sup>2</sup>/area, which, unlike  
363 perimeter/area is a dimensionless measure of leaf shape (and, therefore, does not inherently scale  
364 with size), was strongly dependent on genotype and not influenced by irradiance (Fig 2e).

365

366 *Growth irradiance alters leaf hydraulic conductance in heterobaric but not in homobaric leaves*  
367 *in different tomato genetic backgrounds*

368 Leaf hydraulic conductance ( $K_{\text{leaf}}$ ) is a key parameter determining plant water relations,  
369 as it usually scales up to the whole plant level (Sack & Holbrook 2006). Shading decreased  $K_{\text{leaf}}$   
370 in the heterobaric genotype: MT shade leaves had 41% lower  $K_{\text{leaf}}$  than sun leaves ( $14.95 \pm 1.91$   
371 *vs*  $25.36 \pm 1.32$  mmol H<sub>2</sub>O m<sup>-2</sup> s<sup>-1</sup> MPa<sup>-1</sup>) (Fig 3a,b). Homobaric and heterobaric leaves in the  
372 M82 tomato background (Fig 3c), showed a similar leaf vein phenotype as in MT (Fig 3d)  
373 showed consistently similar results, where shade leaves had 36% lower  $K_{\text{leaf}}$  than sun leaves  
374 ( $18.72 \pm 0.59$  *vs*  $29.6 \pm 2.1$  mmol H<sub>2</sub>O m<sup>-2</sup> s<sup>-1</sup> MPa<sup>-1</sup>) (Fig 3d). The *obv* mutant, on the other  
375 hand, showed similarly low  $K_{\text{leaf}}$  values in either condition and in both genetic backgrounds (MT  
376 sun:  $17.86 \pm 1.26$  *vs* shade:  $17.87 \pm 2.14$  mmol H<sub>2</sub>O m<sup>-2</sup> s<sup>-1</sup> MPa<sup>-1</sup>; M82: sun:  $19.19 \pm 2.24$  *vs*  
377 shade:  $19.17 \pm 2.67$  mmol H<sub>2</sub>O m<sup>-2</sup> s<sup>-1</sup>MPa<sup>-1</sup>) (Fig 3b,e). The results were consistent between  
378 tomato backgrounds, even though both cultivars differ markedly in leaf lamina size and other  
379 leaf structural parameters.

380

381 *Shading reduces stomatal conductance in heterobaric leaves, whereas homobaric leaves*  
382 *maintain similarly low values under both conditions*

383 Previous work has suggested that BSEs could influence photosynthetic assimilation rate  
384 (*A*) by increasing light transmission within the mesophyll (Karabourniotis *et al.* 2000). To  
385 ascertain whether this was the case in our genotypes, we determined photosynthetic light  
386 response curves on fully expanded terminal leaflets attached to plants growing in the greenhouse  
387 under sun or shade treatments (Fig S1). Although no statistical differences were found in the  
388 light response of *A* between heterobaric MT and homobaric *obv* plants (Fig S1), the light  
389 saturation point ( $I_s$ ) was lower in shade *obv* than in the other treatments (Table S1)

390 Since the presence of BSEs can affect lateral flow of CO<sub>2</sub> within the leaf blade  
391 (Pieruschka *et al.* 2006; Morison *et al.* 2007), we next analysed the response of *A* to varying  
392 internal partial pressure of CO<sub>2</sub> in the substomatal cavity ( $C_i$ ) (Table 2). The apparent maximum  
393 carboxylation rate of Rubisco ( $V_{cmax}$ ), the maximum potential rate of electron transport in the  
394 regeneration of RuBP ( $J_{max}$ ) and the speed of use of triose-phosphates (TPU) were reduced by  
395 20.0%, 20.2% and 21.1%, respectively, for shade compared to sun MT plants. In *obv*, the  
396 respective drop between sun and shade plants the same parameters was 10.0%, 7.0% and 6.0%  
397 respectively (Table 2).

398 The hyperbolic relationship between *A* and  $g_s$  measured at ambient CO<sub>2</sub> was not altered  
399 by irradiance level (Fig 4a, b). The lower limit for  $g_s$  values was remarkably similar between  
400 genotypes in both light conditions ( $\sim 0.2 \text{ mol m}^{-2} \text{ s}^{-1}$ ). A 30% decrease in  $g_s$  with a concomitant  
401 limitation to *A* was observed in shade MT (Table 2). In the *obv* mutant,  $g_s$  was lower in the sun  
402 (similar value to shade MT) and remained essentially unchanged by shading, as did *A*. The  $A/g_s$   
403 ratio, or intrinsic water-use efficiency ( $WUE_i$ ), was therefore higher in homobaric *obv* plants  
404 than in heterobaric MT under both irradiance levels (Table 2). A similar, although not  
405 statistically significant difference (possibly owing to the lower number or replicates,  $n=5$ ) was  
406 found in M82 (Fig S2). Dark respiration was not affected by genotype or irradiance level (Table  
407 2). The chlorophyll fluorescence analyses revealed a higher quantum yield of photosystem II  
408 photochemistry ( $\Phi_{PSII}$ ) and electron transport rate (ETR) in homobaric *obv* plants grown in the  
409 sun than in all other treatments. No differences between treatments were found in the  
410 photochemical and non-photochemical quenching (Table S4).



411

412 *Stomatal Pore Area Index is altered by irradiance in heterobaric but not homobaric leaves*

413 Stomatal conductance ( $g_s$ ) is influenced by the maximum stomatal conductance ( $g_{max}$ ),  
414 which is in turn determined by stomatal size and number (Parlange & Waggoner 1970; Franks &  
415 Beerling 2009). To further explore the basis for the differential  $g_s$  response to irradiance between  
416 genotypes, we analysed stomatal traits in terminal leaflets of fully expanded leaves. Stomatal  
417 pore area index (SPI, a combined dimensionless measure of the stomatal density and size) was  
418 increased only in MT sun leaves (Fig 4c), compared to all the other treatments.. Guard cell  
419 length, which is linearly related to the assumed maximum stomatal pore radius, was greater in  
420 *obv* than in MT and was not affected by the irradiance levels (Fig 4d). Thus, the main driver of  
421 the difference in SPI was stomatal density, particularly on the abaxial side, which represents a  
422 quantitatively large contribution (Fig 4e). Adaxial stomatal density was reduced in the shade in  
423 both genotypes, with no differences between them within irradiance levels (Fig 4f).

424

425 *Minor vein density, modelled mesophyll conductance to CO<sub>2</sub> and carbon isotope discrimination*  
426 *are differentially altered by irradiance levels in heterobaric and homobaric leaves*

427 Leaf lamina thickness was reduced by shading in both genotypes, with no difference  
428 between them (Fig 5). These results are in good agreement with the reduced specific leaf area  
429 (SLA) in shade-grown plants (Fig 1c). The palisade to spongy mesophyll thickness ratio was  
430 increased by shading, independently of genotype (Fig 5c). Thickness of the abaxial epidermis, a  
431 proxy for stomatal depth, did not vary in MT between irradiance levels, but was reduced in  
432 shaded *obv* plants (Fig 5d). Intercellular air spaces in the lamina comprised close to 10% of the  
433 cross-sectional area in MT and *obv* plants grown in the sun, but when plants were grown in the  
434 shade, it was increased to 12% in MT and 17% in *obv* (Fig 5e). As venation is a key trait that  
435 influences water distribution in the lamina, we assessed minor vein density (tertiary and higher  
436 orders) and observed a genotype×irradiance interaction (Fig 5b). Vein density was reduced in  
437 both genotypes by shading, but more strongly in MT than in *obv* (Fig 5f).

438 We next used anatomical data (Fig S3) to estimate mesophyll conductance to CO<sub>2</sub> ( $g_m$ ), a  
439 key parameter linking leaf hydraulics, photosynthetic function and leaf anatomy (Flexas *et al.*



440 2013; Tomás *et al.* 2013). Our estimates suggest that the lack of BSEs significantly altered the  
441 value of  $g_m$  in response to shading, whereas the genotypes did not vary significantly for this  
442 parameter when grown in the sun (Table 3). As a way to validate our results, and also due to its  
443 intrinsic interest as a proxy for  $C_i/C_a$  (the ratio of CO<sub>2</sub> concentration inside and outside the leaf)  
444 (Condon *et al.* 2004), we next determined carbon isotope composition ( $\delta^{13}C$ ) in leaves from the  
445 same plants used for the anatomy and gas exchange measurements (Table S2). The *obv* mutation  
446 had a differential effect on carbon isotope discrimination ( $\Delta^{13}C$ ), a parameter that is linearly and  
447 negatively correlated to long-term water-use efficiency (WUE) of plants. Whereas the presence  
448 of the *obv* mutation increased  $\Delta^{13}C$  in the sun (thus, decreased WUE), it had the opposite effect  
449 in the shade [lower  $\Delta^{13}C$  and higher WUE (Fig S4)].

450

451 *Carbohydrate and pigment contents in heterobaric and homobaric leaves under different*  
452 *irradiance*

453 We assessed a basic set of compounds related to primary cell metabolism in MT and *obv*  
454 under both sun and shade conditions, along with photosynthetic pigments (Table S3). As  
455 expected, carbohydrate concentrations were strongly influenced by irradiance level (Table S3).  
456 Shading promoted a decrease in starch content in both genotypes, but of a considerable greater  
457 magnitude in MT (-45.0%) than in *obv* (-28.5%) compared to sun plants (Table S3). Glucose and  
458 fructose were increased in the shade, with no difference between genotypes. The chlorophyll a/b  
459 ratio was similar for all plants. A slight increase in carotenoid levels was found in *obv* shade  
460 plants (Table S4).

461

462 *Morphological and physiological differences between heterobaric and homobaric plant grown*  
463 *under different irradiances do not affect dry mass accumulation or fruit yield*

464 To determine whether the anatomical and physiological differences described above scale  
465 up to the whole-plant level and affect carbon economy and agronomic parameters of tomato, we  
466 determined dry mass and fruit yield in sun- and shade-grown plants of MT and *obv*. There was  
467 no difference in plant height or in the number of leaves before the first inflorescence, for plants  
468 of either genotype in both light intensities (Table 4). There was a decrease in stem diameter in

469 shade MT and *obv* plants, compared to sun plants. Leaf insertion angle relative to the stem,  
470 however, was steeper in the *obv* mutant under both irradiance conditions. Different light  
471 intensities did not change leaf dry weight, *obv* plants showed a 24.3% reduction in stem dry  
472 weight, 46.4% in root dry weight and 31% in total dry weight when compared to the sun  
473 treatment. The results were similar for MT, so no changes in dry mass allocation pattern were  
474 discernible between genotypes. Side branching is one of the most common morphological  
475 parameters affected by shading (Casal 2013). A decrease in side branching was found in both  
476 genotypes upon shade treatment, with no differences between them (Fig S5).

477 Vegetative dry mass accumulation was affected solely by irradiance level with no  
478 influence of the genotype, and therefore, independent of the presence or absence of BSEs. To  
479 ensure that potential differences arising from altered partitioning or allocation of carbon were not  
480 overlooked, we also assessed reproductive traits, *i.e.* parameters related to tomato fruit yield.  
481 Average fruit yield per plant was reduced by shading, but did not differ between genotypes  
482 within each irradiance condition, in two different tomato genetic backgrounds (MT and M82)  
483 (Table S5). The content of soluble solids in the fruit (°Brix), a parameter of agronomic interest,  
484 was also consistently stable across genotypes and treatments.

485

## 486 Discussion

487 Heterobaric or homobaric plants are defined based on the presence or absence of BSEs, a  
488 structural characteristic associated with certain life forms and ecological distribution. Most of the  
489 studies addressing the function of BSEs have been based on large-scale multi-species  
490 comparisons, which restricts the conclusions to a statistical effect. Many structural,  
491 photosynthetic and hydraulic leaf traits are strongly co-ordinated and co-selected, therefore  
492 reducing the discriminating power of analyses involving species of different life forms and  
493 ecological background (Lloyd *et al.* 2013). Here, we compared different genotypes of a single  
494 herbaceous species (tomato) varying for a defined and ecologically relevant leaf structural  
495 feature: the presence of BSEs. The *obv* mutant lacks BSEs and thus produces homobaric leaves,  
496 compared to tomato cultivar Micro-Tom (MT), that has heterobaric leaves (Zsögön *et al.* 2015).  
497 We cultivated the plants under contrasting levels of irradiance (sun vs shade) and investigated  
498 leaf structure, hydraulics and photosynthetic function. We hypothesized that homobaric leaves,

499 lacking a key physical feature that increases carbon assimilation and leaf hydraulic integration,  
500 would exhibit less plasticity than heterobaric leaves in their response to environmental  
501 conditions.

502         The presence or absence of BSEs did not affect general leaf morphology in either sun or  
503 shade conditions. SLA and leaf shape were altered by irradiance level, but without differences  
504 between genotypes. A generally higher photosynthetic capacity has been described for  
505 heterobaric species (Inoue *et al.* 2015), partially attributed to the optical properties of BSEs that  
506 enhance light transmission within the leaf mesophyll (Karabourniotis *et al.* 2000; Nikolopoulos  
507 *et al.* 2002). We did not observe such a photosynthetic advantage for heterobaric plants grown in  
508 high irradiance, but rather similar  $A$  values for both genotypes; indeed, the only difference we  
509 found for this genotype was a higher  $g_s$  which, despite not conferring higher  $A$ , might be  
510 beneficial in terms of latent heat loss, resulting in an improved thermal balance. Shading, on the  
511 other hand, reduced  $A$  in heterobaric MT plants, but not in *obv*. Since  $g_s$  and  $V_{cmax}$  were identical  
512 for both treatments, a higher  $A$  could be explained by a higher  $g_m$ , and, consequently, higher  
513 chloroplast  $CO_2$  concentration.

514         We found that *obv* plants in the shade presented a high amount of intercellular air spaces  
515 and a high mesophyll surface area exposed to the intercellular air spaces ( $S_{mes}/S$ ). It seems that  
516 the absence of BSEs led to a higher  $S_{mes}/S$  as they allowed more space to become available  
517 between palisade cells; on the other hand, presence of BSEs would ‘push’ palisade cells against  
518 each other, decreasing their exposure to the intercellular air spaces. An expected outcome of a  
519 higher  $S_{mes}/S$  is to increase the anatomical  $g_m$ , as it was the case for the *obv* plants in the shade  
520 (Table S6). However, our alternative  $g_m$  estimate (using the Ethier method, which takes into  
521 account both anatomical and biochemical  $g_m$  components) did not indicate any difference among  
522 plants (Table S6). Such discrepancy between the different estimates might reside in an important  
523 contribution from the biochemical components of  $g_m$  which is believed to be influenced by  
524 carbonic anhydrase and aquaporins expression (Flexas, Ribas-Carbó, Diaz-Espejo, Galmés &  
525 Medrano 2008; Tomás *et al.* 2013). In any case, our findings points to the need of further  
526 investigation of the role of BSEs on  $g_m$  using more refined methodologies (Pons *et al.* 2009).

527

528 In the shade,  $g_s$  was not changed between genotypes, thus resulting in an enhanced ratio  
529 between photosynthetic carbon gain and transpiratory water loss in homobaric *obv* plants. This  
530 observation was borne out by the reduced  $\Delta^{13}\text{C}$  in *obv* compared to the heterobaric MT. Long-  
531 term WUE is therefore higher in homobaric plants than in heterobaric plants in the shade,  
532 whereas the opposite is true in sun conditions. This provides a reasonable working hypothesis to  
533 explain the strongly biased ecological distribution of hetero- and homobaric species.

534 The higher incidence of heterobaric species in the canopy of both temperate and tropical  
535 forest canopies has been attributed to the effect of BSEs on leaf hydraulic integration (Kenzo *et al.*  
536 *2007*; Inoue *et al.* 2015; Kawai *et al.* 2017).  $K_{\text{leaf}}$  was higher in heterobaric than in homobaric  
537 sun plants, consistent with the notion that BSEs act as an additional extra-xylematic pathway for  
538 the flow of liquid water thus enabling the maintenance of a higher  $g_s$  (Zwieniecki *et al.* 2007;  
539 Buckley *et al.* 2011). On the other hand, homobaric and heterobaric leaves showed similar  $K_{\text{leaf}}$   
540 values in the shade, indicating that the presence of BSEs differentially affects leaf hydraulic  
541 architecture in response to irradiance.  $K_{\text{leaf}}$  is dynamically influenced by irradiance over different  
542 time scales, in the short-term by yet unknown factors (Scoffoni *et al.* 2008), and in the long-term  
543 by developmental plasticity altering leaf structural and physiological traits (Scoffoni *et al.* 2015).  
544 Buckley *et al.* (2015) found that BSEs increased  $K_{\text{leaf}}$  by 10%. They found that heterobaric  
545 species had 34% higher  $K_{\text{leaf}}$ , but this must have been due to traits other than BSEs themselves.  
546 Interestingly, under high irradiance (sun),  $K_{\text{leaf}}$  was *c.* 30% higher in MT in comparison to *obv*  
547 plants, which is in line with the Buckley *et al.* (2015) estimates. A possible role for aquaporins  
548 present in the BS and/or the mesophyll has been proposed (Cochard *et al.* 2007) and it is known  
549 that aquaporins have their expression reduced under shade (Laur and Hacke 2013). Thus, it  
550 seems reasonable to assume that other  $K_{\text{leaf}}$  components were downregulated under shade,  
551 masking the contribution of BSEs to  $K_{\text{leaf}}$ .

552 A large set of leaf physiological and structural traits shift in tandem in response to  
553 irradiance (Scoffoni *et al.* 2015). Particularly, plants developing under high light present a higher  
554 thermal energy load, which is dissipated mainly through leaf transpiration (Martins *et al.* 2014).  
555 In order to achieve higher transpiration rates, hydraulic supply and demand must be balanced,  
556 and vein density and patterning is coordinated with stomatal distribution to optimize resource  
557 utilization (Brodribb and Jordan 2011). Such coordination occurs across vascular plant species,

558 but exactly how veins and stomata “communicate” with each other remains to be elucidated  
559 (Carins Murphy *et al.* 2017). In this sense, one of the proposed roles of BSEs is to act as a  
560 hydraulic linkage route between the vascular bundles and the epidermis, integrating these  
561 otherwise separated tissues (Zwieniecki *et al.* 2007). Here, we found that the presence of BSEs  
562 allowed a highly plastic coordination between veins and stomata, upregulating hydraulic supply  
563 and demand under high light (Fig 6). On the other hand, in genotypes lacking BSEs, the abaxial  
564 stomata and vein densities remained unchanged (Fig 6). At the moment there is no evidence to  
565 suggest BSEs are directly responsible for the plasticity in VLA and stomatal pore area index, nor  
566 that if they are responsible, it is because of an hydraulic effect on stomata. That seems unlikely,  
567 given that stomatal patterning mostly takes place before leaves begin to expand and transpire  
568 substantially. More data is needed to address this point. Another potential structural benefit of  
569 BSEs would be the provision of mechanical support, acting analogously to a suspension bridge,  
570 partially relieving the vein system from such duty and allowing heterobaric leaves greater  
571 flexibility in vein spacing compared to homobaric ones. Thus, the presence of BSEs could  
572 represent a hub coordinating trait plasticity in response to irradiance .

573 An open question is why the structural and physiological effects of the absence of BSEs  
574 in a leaf do not scale up to whole-plant carbon economy and growth. In other words, under what  
575 set of environmental conditions (if there is one) does the presence or absence of BSEs result in a  
576 significant fitness (*i.e.* survival and reproduction) difference between genotypes? The *obv*  
577 mutation has been incorporated by breeders in many tomato cultivar and hybrids (Jones *et al.*  
578 2007), suggesting that it can confer some agronomic advantage. The present work was limited to  
579 analyzing the effect of discrete differences in irradiance and thus represents only a starting point  
580 to answering this question. The strong plasticity of plant development in response to irradiance  
581 (all other conditions being similar) could be the reason why potential economic differences  
582 between genotypes were canceled out within a given light environment. It is not possible to rule  
583 out that stronger quantitative differences in irradiance levels other than the ones tested here could  
584 tilt the phenotypic and fitness scales in favor of one of the leaf designs (*i.e.*  
585 heterobaric/homobaric). Alternatively, other variables (*e.g.* water and nitrogen availability,  
586 ambient CO<sub>2</sub> concentration) and combinations thereof could result in conditions where the  
587 difference in leaf structure scales up to the whole plant level. Given the presumed hydraulic  
588 benefit of BSEs, situations where the hydraulic system is pushed to the limit (*e.g.* high

589 evaporative demand) might be useful to maximize the benefit of BSEs. We endeavor to address  
590 these questions in the near future.

591

## 592 **Conclusions**

593 The presence of BSEs in heterobaric tomato plants is coordinated with plastic variation in  
594 both structural and physiological leaf traits under different growth irradiance levels. Irradiance  
595 level altered mainly stomata pore index, minor vein density and leaf hydraulic conductance in  
596 heterobaric plants and leaf intercellular air spaces, modelled mesophyll conductance and  
597 photosynthetic assimilation rate in homobaric plants. This variation, however, allows both  
598 genotypes to maintain leaf physiological performance and growth under both irradiance  
599 conditions and results in the carbon economy and allocation of either genotype being  
600 indistinguishable within each irradiance level. Further insight into this fascinating complexity  
601 will come when the genetic basis for BSE development is unveiled.

602

## 603 **Acknowledgments**

604

605 This work was funded by a grant (RED-00053-16) from the Foundation for Research Assistance  
606 of the Minas Gerais State (FAPEMIG, Brazil). L.E.P.P. acknowledges a grant (307040/2014-3)  
607 from the National Council for Scientific and Technological Development (CNPq, Brazil).

608

## 609 **Author contributions**

610 M.A.M.B. and D.H.C. conducted experiments and prepared Figures and/or tables. A.A.A.,  
611 W.L.A. D.M.R., S.C.V.M. and L.E.P.P. designed experiments, contributed  
612 reagents/materials/analysis tools and reviewed drafts of the paper. A.Z. conceived and designed  
613 the experiments, analyzed the data and wrote the paper with contributions from the other authors.

614

615



616 **References**

617

618 Abramoff M.D., Magalhães P.J. & Ram S.J. (2004) Biophotonics international. *Biophotonics*  
619 *international* **11**, 36–42.

620 Berghuijs H.N.C., Yin X., Tri Ho Q., van der Putten P.E.L., Verboven P., Retta M.A., ... Struik  
621 P.C. (2015) Modelling the relationship between CO<sub>2</sub> assimilation and leaf anatomical  
622 properties in tomato leaves. *Plant Science* **238**, 297–311.

623 Bonhomme V., Picq S., Gaucherel C., Claude J., Bonhomme V., Picq S., ... Claude J. (2014)  
624 Momocs: Outline Analysis Using R. *Journal of Statistical Software* **56**, 1–24.

625 Brodribb T.J. & Jordan G.J. (2011) Water supply and demand remain balanced during leaf  
626 acclimation of *Nothofagus cunninghamii* trees. *New Phytologist* **192**, 437–448.

627 Buckley T.N., Sack L. & Gilbert M.E. (2011) The role of bundle sheath extensions and life form  
628 in stomatal responses to leaf water status. *Plant Physiology* **156**, 962–973.

629 Carins Murphy M., Dow G., Jordan G. & Brodribb T. (2017) Vein density is independent of  
630 epidermal cell size in *Arabidopsis* mutants. *Functional Plant Biology* **44**, 410–418.

631 Carvalho R.F., Campos M.L., Pino L.E., Crestana S.L., Zsögön A., Lima J.E., ... Peres L.E.  
632 (2011) Convergence of developmental mutants into a single tomato model system: “Micro-  
633 Tom” as an effective toolkit for plant development research. *Plant Methods* **7**, 18.

634 Casal J.J. (2013) Photoreceptor Signaling Networks in Plant Responses to Shade. *Annual Review*  
635 *of Plant Biology* **64**, 403–427.

636 Cochard H., Venisse J.-S., Barigah T.S., Brunel N., Herbette S., Guilliot A., ... Sakr S. (2007)  
637 Putative role of aquaporins in variable hydraulic conductance of leaves in response to light.  
638 *Plant Physiology* **143**, 122–133.

639 Condon A.G., Richards R.A., Rebetzke G.J. & Farquhar G.D. (2004) Breeding for high water-  
640 use efficiency. *Journal of Experimental Botany* **55**, 2447–60.

641 Eid Gamel R., Elsayed A., Bashasha J. & Haroun S. (2016) Priming Tomato Cultivars in  $\beta$ -  
642 sitosterol or Gibberellic Acid Improves Tolerance for Temperature Stress. *International*  
643 *Journal of Botany* **13**, 1–14.

644 Esau K. (1977) *Anatomy of Seed Plants*, 2nd ed. John Wiley & Sons, Inc., New York.

645 Evans J., Caemmerer S., Setchell B. & Hudson G. (1994) The Relationship Between CO<sub>2</sub>  
646 Transfer Conductance and Leaf Anatomy in Transgenic Tobacco With a Reduced Content  
647 of Rubisco. *Australian Journal of Plant Physiology* **21**, 475.

648 Evans J.R. & Poorter H. (2001) Photosynthetic acclimation of plants to growth irradiance: the  
649 relative importance of specific leaf area and nitrogen partitioning in maximizing carbon  
650 gain. *Plant, Cell and Environment* **24**, 755–767.

651 Farquhar G.D., von Caemmerer S. & Berry J.A. (1980) A biochemical model of photosynthetic  
652 CO<sub>2</sub> assimilation in leaves of C<sub>3</sub> species. *Planta* **149**, 78–90.



- 653 Farquhar G.D. & Sharkey T.D. (1982) Stomatal conductance and photosynthesis. *Annual Review*  
654 *of Plant Physiology* **33**, 317–345.
- 655 Fernie A.R., Roscher A., Ratcliffe R.G. & Kruger N.J. (2001) Fructose 2,6-bisphosphate  
656 activates pyrophosphate: Fructose-6-phosphate 1-phosphotransferase and increases triose  
657 phosphate to hexose phosphate cycling heterotrophic cells. *Planta* **212**, 250–263.
- 658 Flexas J., Ribas-Carbó M., Diaz-Espejo A., Galmés J. & Medrano H. (2008) Mesophyll  
659 conductance to CO<sub>2</sub>: current knowledge and future prospects. *Plant Cell and Environment*  
660 **31**, 602–621.
- 661 Flexas J., Scoffoni C., Gago J. & Sack L. (2013) Leaf mesophyll conductance and leaf hydraulic  
662 conductance: an introduction to their measurement and coordination. *Journal of*  
663 *Experimental Botany* **64**, 3965–3981.
- 664 Franks P.J. & Beerling D.J. (2009) Maximum leaf conductance driven by CO<sub>2</sub> effects on  
665 stomatal size and density over geologic time. *Proceedings of the National Academy of*  
666 *Sciences* **106**, 10343–10347.
- 667 Genty B., Briantais J.-M. & Baker N.R. (1989) The relationship between the quantum yield of  
668 photosynthetic electron transport and quenching of chlorophyll fluorescence. *Biochimica et*  
669 *Biophysica Acta (BBA) - General Subjects* **990**, 87–92.
- 670 Guyot G., Scoffoni C. & Sack L. (2012) Combined impacts of irradiance and dehydration on leaf  
671 hydraulic conductance: insights into vulnerability and stomatal control. *Plant, Cell &*  
672 *Environment* **35**, 857–871.
- 673 Hacker J. & Neuner G. (2007) Ice propagation in plants visualized at the tissue level by infrared  
674 differential thermal analysis (IDTA). *Tree Physiology* **27**, 1661–1670.
- 675 Inoue Y., Kenzo T., Tanaka-Oda A., Yoneyama A. & Ichie T. (2015) Leaf water use in  
676 heterobaric and homobaric leafed canopy tree species in a Malaysian tropical rain forest.  
677 *Photosynthetica* **53**, 177–186.
- 678 Iwata H., Niikura S., Matsuura S., Takano Y. & Ukai Y. (1998) Evaluation of variation of root  
679 shape of Japanese radish (*Raphanus sativus* L.) based on image analysis using elliptic  
680 Fourier descriptors. *Euphytica* **102**, 143–149.
- 681 Iwata H. & Ukai Y. (2002) SHAPE: A Computer Program Package for Quantitative Evaluation  
682 of Biological Shapes Based on Elliptic Fourier Descriptors. *Journal of Heredity* **93**, 384–  
683 385.
- 684 Jones C.M., Rick C.M., Adams D., Jernstedt J. & Chetelat R.T. (2007) Genealogy and fine  
685 mapping of *Obscuravenosa*, a gene affecting the distribution of chloroplasts in leaf veins  
686 and evidence of selection during breeding of tomatoes (*Lycopersicon esculentum*;  
687 *Solanaceae*). *American Journal of Botany* **94**, 935–947.
- 688 Karabourniotis G., Bornman J.F. & Nikolopoulos D. (2000) A possible optical role of the bundle  
689 sheath extensions of the heterobaric leaves of *Vitis vinifera* and *Quercus coccifera*. *Plant,*  
690 *Cell and Environment* **23**, 423–430.
- 691 Kawai K., Miyoshi R. & Okada N. (2017) Bundle sheath extensions are linked to water relations

- 692 but not to mechanical and structural properties of leaves. *Trees*, 1–11.
- 693 Kenzo T., Ichie T., Watanabe Y. & Hiromi T. (2007) Ecological distribution of homobaric and  
694 heterobaric leaves in tree species of Malaysian lowland tropical rainforest. *American*  
695 *Journal of Botany* **94**, 764–775.
- 696 Laur J. & Hacke U.G. (2013) Transpirational demand affects aquaporin expression in poplar  
697 roots. *Journal of Experimental Botany* **64**, 2283–2293.
- 698 Lawson T. & Morison J. (2006) Visualising patterns of CO<sub>2</sub> diffusion in leaves. *New Phytologist*  
699 **169**, 641–643.
- 700 Leegood R.C. (2008) Roles of the bundle sheath cells in leaves of C<sub>3</sub> plants. *Journal of*  
701 *Experimental Botany* **59**, 1663–1673.
- 702 Martins S.C. V., Galmés J., Cavatte P.C., Pereira L.F., Ventrella M.C. & DaMatta F.M. (2014)  
703 Understanding the low photosynthetic rates of sun and shade coffee leaves: bridging the gap  
704 on the relative roles of hydraulic, diffusive and biochemical constraints to photosynthesis.  
705 *PLoS ONE* **9**, e95571.
- 706 McAdam S.A.M., Eléouët M.P., Best M., Brodribb T.J., Murphy M.C., Cook S.D., ... Urquhart  
707 S. (2017) Linking Auxin with Photosynthetic Rate via Leaf Venation. *Plant physiology* **175**,  
708 351–360.
- 709 Morison J.I.L., Lawson T. & Cornic G. (2007) Lateral CO<sub>2</sub> Diffusion inside Dicotyledonous  
710 Leaves Can Be Substantial: Quantification in Different Light Intensities. *Plant Physiology*  
711 **145**, 680–690.
- 712 Neger F. (1918) Wegsamkeit der Laubblätter für Gase. *Flora* **111**, 152–161.
- 713 Niinemets U. (2012) Optimization of foliage photosynthetic capacity in tree canopies: towards  
714 identifying missing constraints. *Tree Physiology* **32**, 505–509.
- 715 Niinemets Ü., Cescatti A., Rodeghiero M. & Tosens T. (2006) Complex adjustments of  
716 photosynthetic potentials and internal diffusion conductance to current and previous light  
717 availabilities and leaf age in Mediterranean evergreen species *Quercus ilex*. *Plant, Cell and*  
718 *Environment* **29**, 1159–1178.
- 719 Niinemets Ü. & Reichstein M. (2003) Controls on the emission of plant volatiles through  
720 stomata: Differential sensitivity of emission rates to stomatal closure explained. *Journal of*  
721 *Geophysical Research* **108**, 4208.
- 722 Niinemets Ü. & Sack L. (2006) Structural determinants of leaf light-harvesting capacity and  
723 photosynthetic potentials. In *Progress in Botany*. pp. 385–419. Springer-Verlag,  
724 Berlin/Heidelberg.
- 725 Nikolopoulos D., Liakopoulos G., Drossopoulos I. & Karabourniotis G. (2002) The Relationship  
726 between Anatomy and Photosynthetic Performance of Heterobaric Leaves. *Plant*  
727 *Physiology* **129**, 235–243.
- 728 Nunes-Nesi A., Nascimento V. de L., de Oliveira Silva F.M., Zsögön A., Araújo W.L. & Sulpice  
729 R. (2016) Natural genetic variation for morphological and molecular determinants of plant

- 730 growth and yield. *Journal of Experimental Botany* **67**, 2989–3001.
- 731 Oguchi R., Hikosaka K. & Hirose T. (2003) Does the photosynthetic light-acclimation need  
732 change in leaf anatomy? *Plant Cell and Environment* **26**, 505–512.
- 733 Oguchi R., Hikosaka K. & Hirose T. (2005) Leaf anatomy as a constraint for photosynthetic  
734 acclimation: differential responses in leaf anatomy to increasing growth irradiance among  
735 three deciduous trees. *Plant Cell and Environment* **28**, 916–927.
- 736 Oguchi R., Hikosaka K., Hiura T. & Hirose T. (2006) Leaf anatomy and light acclimation in  
737 woody seedlings after gap formation in a cool-temperate deciduous forest. *Oecologia* **149**,  
738 571–582.
- 739 Ohtsuka A., Sack L. & Taneda H. (2018) Bundle sheath lignification mediates the linkage of leaf  
740 hydraulics and venation. *Plant, Cell & Environment* **41**, 342–353.
- 741 Parlange J.Y. & Waggoner P.E. (1970) Stomatal dimensions and resistance to diffusion. *Plant*  
742 *physiology* **46**, 337–42.
- 743 Pieruschka R., Schurr U., Jensen M., Wolff W.F. & Jahnke S. (2006) Lateral diffusion of CO<sub>2</sub>  
744 from shaded to illuminated leaf parts affects photosynthesis inside homobaric leaves. *New*  
745 *Phytologist* **169**, 779–787.
- 746 Pons T.L., Flexas J., von Caemmerer S., Evans J.R., Genty B., Ribas-Carbo M. & Brugnoli E.  
747 (2009) Estimating mesophyll conductance to CO<sub>2</sub>: methodology, potential errors, and  
748 recommendations. *Journal of Experimental Botany* **60**, 2217–2234.
- 749 Prado K. & Maurel C. (2013) Regulation of leaf hydraulics: from molecular to whole plant  
750 levels. *Frontiers in Plant Science* **4**, 255.
- 751 Praxedes S.C., DaMatta F.M., Loureiro M.E., G. Ferrão M.A. & Cordeiro A.T. (2006) Effects of  
752 long-term soil drought on photosynthesis and carbohydrate metabolism in mature robusta  
753 coffee (*Coffea canephora* Pierre var. kouillou) leaves. *Environmental and Experimental*  
754 *Botany* **56**, 263–273.
- 755 Quentin A.G., Pinkard E.A., Ryan M.G., Tissue D.T., Baggett L.S., Adams H.D., ... Woodruff  
756 D.R. (2015) Non-structural carbohydrates in woody plants compared among laboratories.  
757 *Tree Physiology* **35**, tpv073.
- 758 R Core Team (2018) R: a language and environment for statistical computing.
- 759 Read J. & Stokes A. (2006) Plant biomechanics in an ecological context. *American Journal of*  
760 *Botany* **93**, 1546–65.
- 761 Rodeghiero M., Niinemets Ü. & Cescatti A. (2007) Major diffusion leaks of clamp-on leaf  
762 cuvettes still unaccounted: How erroneous are the estimates of Farquhar et al. model  
763 parameters? *Plant, Cell and Environment* **30**, 1006–1022.
- 764 Ronchi C.P., DaMatta F.M., Batista K.D., Moraes G.A.B.K., Loureiro M.E. & Ducatti C. (2006)  
765 Growth and photosynthetic down-regulation in *Coffea arabica* in response to restricted root  
766 volume. *Functional Plant Biology* **33**, 1013.
- 767 Sack L., Cowan P.D., Jaikumar N. & Holbrook N.M. (2003) The “hydrology” of leaves: co-

- 768 ordination of structure and function in temperate woody species. *Plant, Cell and*  
769 *Environment* **26**, 1343–1356.
- 770 Sack L. & Frole K. (2006) Leaf structural diversity is related to hydraulic capacity in tropical  
771 rain forest trees. *Ecology* **87**, 483–491.
- 772 Sack L. & Holbrook N.M. (2006) Leaf hydraulics. *Annual Review of Plant Biology* **57**, 361–381.
- 773 Sack L., Scoffoni C., McKown A.D., Frole K., Rawls M., Havran J.C., ... Tran T. (2012)  
774 Developmentally based scaling of leaf venation architecture explains global ecological  
775 patterns. *Nature Communications* **3**, 837.
- 776 Schlichting C.D. (1986) The Evolution of Phenotypic Plasticity in Plants. *Annual Review of*  
777 *Ecology and Systematics* **17**, 667–693.
- 778 Scoffoni C., Albuquerque C., Brodersen C.R., Townes S. V, John G.P., Bartlett M.K., ... Sack L.  
779 (2017) Outside-Xylem Vulnerability, Not Xylem Embolism, Controls Leaf Hydraulic  
780 Decline during Dehydration. *Plant Physiology* **173**, 1197–1210.
- 781 Scoffoni C., Kunkle J., Pasquet-Kok J., Vuong C., Patel A.J., Montgomery R.A., ... Sack L.  
782 (2015) Light-induced plasticity in leaf hydraulics, venation, anatomy, and gas exchange in  
783 ecologically diverse Hawaiian lobeliads. *New Phytologist* **207**, 43–58.
- 784 Scoffoni C., Pou A.L., Cia, Aasamaa K.R. & Sack L. (2008) The rapid light response of leaf  
785 hydraulic conductance: new evidence from two experimental methods. *Plant Cell &*  
786 *Environment* **31**, 1803–1812.
- 787 Shipley B. (2002) Trade-offs between net assimilation rate and specific leaf area in determining  
788 relative growth rate: relationship with daily irradiance. *Functional Ecology* **16**, 682–689.
- 789 Silva W.B., Vicente M.H., Robledo J.M., Reartes D.S., Ferrari R.C., Bianchetti R., ... Zsögön A.  
790 (2018) SELF-PRUNING Acts Synergistically with DIAGEOTROPICA to Guide Auxin  
791 Responses and Proper Growth Form. *Plant physiology* **176**, 2904–2916.
- 792 Terashima I. (1992) Anatomy of Nonuniform Leaf Photosynthesis. *Photosynthesis Research* **31**,  
793 195–212.
- 794 Terashima I., Hanba Y.T., Tazoe Y., Vyas P. & Yano S. (2006) Irradiance and phenotype:  
795 comparative eco-development of sun and shade leaves in relation to photosynthetic CO<sub>2</sub>  
796 diffusion. *Journal of Experimental Botany* **57**, 343–354.
- 797 Terashima I., Hanba Y.T., Tholen D. & Niinemets Ü. (2011) Leaf functional anatomy in relation  
798 to photosynthesis. *Plant Physiology* **155**, 108–16.
- 799 Terashima I., Miyazawa S.-I. & Hanba Y.T. (2001) Why are Sun Leaves Thicker than Shade  
800 Leaves? Consideration based on Analyses of CO<sub>2</sub> Diffusion in the Leaf. *Journal of Plant*  
801 *Research* **114**, 93–105.
- 802 Thain J.F. (1983) Curvature Correction Factors in the Measurement of Cell Surface Areas in  
803 Plant Tissues1. *Journal of Experimental Botany* **34**, 87–94.
- 804 Tomás M., Flexas J., Copolovici L., Galmés J., Hallik L., Medrano H., ... Niinemets Ü. (2013)  
805 Importance of leaf anatomy in determining mesophyll diffusion conductance to CO<sub>2</sub> across

806 species: quantitative limitations and scaling up by models. *Journal of Experimental Botany*  
807 **64**, 2269–81.

808 Tosens T., Niinemets U., Vislap V., Eichelmann H. & Castro Díez P. (2012) Developmental  
809 changes in mesophyll diffusion conductance and photosynthetic capacity under different  
810 light and water availabilities in *Populus tremula*: how structure constrains function. *Plant,*  
811 *cell & environment* **35**, 839–56.

812 Trifiló P., Raimondo F., Savi T., Lo Gullo M.A. & Nardini A. (2016) The contribution of  
813 vascular and extra-vascular water pathways to drought-induced decline of leaf hydraulic  
814 conductance. *Journal of Experimental Botany* **67**, 5029–39.

815 Valladares F., Gianoli E. & Gómez J.M. (2007) Ecological limits to plant phenotypic plasticity.  
816 *New Phytologist* **176**, 749–63.

817 Wickham H. (2016) *ggplot2: elegant graphics for data analysis*, 2nd ed. Springer.

818 Wylie R.B. (1943) The Role of the Epidermis in Foliar Organization and its Relations to the  
819 Minor Venation. *American Journal of Botany* **30**, 273–280.

820 Wylie R.B. (1952) The bundle sheath extension in leaves of dicotyledons. *American Journal of*  
821 *Botany* **39**, 645–651.

822 Zsögön A., Alves Negrini A.C., Peres L.E.P., Nguyen H.T. & Ball M.C. (2015) A mutation that  
823 eliminates bundle sheath extensions reduces leaf hydraulic conductance, stomatal  
824 conductance and assimilation rates in tomato (*Solanum lycopersicum*). *New Phytologist*  
825 **205**, 618–626.

826 Zwieniecki M.A., Brodribb T.J. & Holbrook N.M. (2007) Hydraulic design of leaves: insights  
827 from rehydration kinetics. *Plant Cell & Environment* **30**, 910–921.

828

829

830

831

832

833

834

835

836

837

838

839

840

841

842

843 **Tables**

**Table 1.** Description of the plant material used in this study. Micro-Tom (MT) and M82 are two tomato cultivars that differ in growth habit due mostly to the presence of a mutant allele of the *DWARF* gene, which codes for a key enzyme of the brassinosteroid biosynthesis pathway. The molecular identity of *OBSCURAVENOSA* (*OBV*) is unknown. MT harbors a functional, dominant allele of *OBV*, whereas M82 is a mutant (*obv*). F1 plants are hybrids with a 50/50 MT/M82 genomic complement, differing only in the presence or absence of BSEs. The F1 plants are otherwise phenotypically indistinguishable from the M82 parent.

| <b>Parental genotype</b> | MT                 | MT- <i>obv</i>       | M82                  | F1 MT×M82          | F1 MT- <i>obv</i> ×M82 |
|--------------------------|--------------------|----------------------|----------------------|--------------------|------------------------|
| <i>Plant height</i>      |                    |                      |                      |                    |                        |
| Genotype                 | <i>dwarf/dwarf</i> | <i>dwarf/dwarf</i>   | <i>DWARF/DWARF</i>   | <i>DWARF/dwarf</i> | <i>DWARF/dwarf</i>     |
| Phenotype                | Dwarf plant        | Dwarf plant          | Tall plant           | Tall plant         | Tall plant             |
| <i>BSEs</i>              |                    |                      |                      |                    |                        |
| Genotype                 | <i>OBV/OBV</i>     | <i>obv/obv</i>       | <i>obv/obv</i>       | <i>OBV/obv</i>     | <i>obv/obv</i>         |
| Phenotype                | BSEs (clear veins) | No BSEs (dark veins) | No BSEs (dark veins) | BSEs (clear veins) | No BSEs (dark veins)   |

844

845

846

847

848

849

850

851

852

853

854

855

856

857

858

859

860  
861  
862  
863  
864  
865  
866  
867  
868  
869  
870  
871  
872  
873  
874  
875  
876  
877  
878  
879  
880  
881  
882  
883  
884  
885

**Table 2.** Gas exchange parameters determined in fully-expanded leaves of heterobaric (Micro-Tom, MT) and homobaric (*obscuravenosa*, *obv*) in two irradiance levels (sun/shade, 900/300  $\mu\text{mol photons m}^{-2} \text{s}^{-1}$ ).

|                                                              | Sun                |                    | Shade              |                    |
|--------------------------------------------------------------|--------------------|--------------------|--------------------|--------------------|
|                                                              | MT                 | <i>obv</i>         | MT                 | <i>obv</i>         |
| $A$ ( $\mu\text{mol CO}_2 \text{ m}^{-2} \text{ s}^{-1}$ )   | 21.29 $\pm$ 1.34a  | 20.74 $\pm$ 1.44a  | 17.07 $\pm$ 0.83b  | 20.26 $\pm$ 0.48a  |
| $g_s$ ( $\text{mol m}^{-2} \text{ s}^{-1}$ )                 | 0.373 $\pm$ 0.039a | 0.275 $\pm$ 0.020b | 0.263 $\pm$ 0.016b | 0.278 $\pm$ 0.018b |
| $TE_i$ ( $A/g_s$ )                                           | 59.16 $\pm$ 3.25b  | 76.26 $\pm$ 2.16a  | 65.51 $\pm$ 2.08b  | 74.11 $\pm$ 3.55a  |
| $V_{c,\text{max}}$ ( $\mu\text{mol m}^{-2} \text{ s}^{-1}$ ) | 82.7 $\pm$ 6.04a   | 80.5 $\pm$ 6.26a   | 66.8 $\pm$ 4.38a   | 72.7 $\pm$ 7.72a   |
| $J_{\text{max}}$ ( $\mu\text{mol m}^{-2} \text{ s}^{-1}$ )   | 167.5 $\pm$ 5.74a  | 155.5 $\pm$ 8.48a  | 133.5 $\pm$ 4.54b  | 130.2 $\pm$ 3.31b  |
| TPU ( $\mu\text{mol m}^{-2} \text{ s}^{-1}$ )                | 12.1 $\pm$ 0.34a   | 11.0 $\pm$ 0.62a   | 9.6 $\pm$ 0.36b    | 10.3 $\pm$ 0.1a    |
| $R_d$ ( $\mu\text{mol CO}_2 \text{ m}^{-2} \text{ s}^{-1}$ ) | 1.49 $\pm$ 0.43 a  | 1.80 $\pm$ 0.45 a  | 1.42 $\pm$ 0.38 a  | 1.45 $\pm$ 0.39 a  |

Values are means  $\pm$  s.e.m (n=8 for  $A$ ,  $g_s$  and  $TE_i$ ; n=6 for other parameters). Values followed by the same letter in each row were not significantly different by Tukey test at 5% probability.



886  
887  
888  
889  
890  
891  
892  
893  
894  
895  
896  
897  
898  
899  
900  
901  
902  
903  
904  
905  
906  
907  
908  
909  
910  
911  
912  
913  
914

**Table 3.** Mesophyll conductance modeled from anatomical characteristics ( $g_{m\_anatomical}$ ), gas phase conductance inside the leaf from substomatal cavities to outer surface of cell walls ( $g_{ias}$ ), conductance in liquid and lipid phases from outer surface of cell walls to chloroplasts ( $g_{liq}$ ) and mesophyll surface area exposed to intercellular airspace ( $S_m/S$ ) determined in fully-expanded leaves of heterobaric (Micro-Tom, MT) and homobaric (*obscuravenosa*, *obv*) in two irradiance levels (sun/shade, 900/300  $\mu\text{mol photons m}^{-2} \text{s}^{-1}$ ).

|                                                           | Sun                       |                           | Shade                      |                           |
|-----------------------------------------------------------|---------------------------|---------------------------|----------------------------|---------------------------|
|                                                           | MT                        | <i>obv</i>                | MT                         | <i>obv</i>                |
| $g_{m\_anatomical}$ ( $\text{mol m}^{-2} \text{s}^{-1}$ ) | $0.107 \pm 0.005\text{c}$ | $0.132 \pm 0.005\text{b}$ | $0.124 \pm 0.006\text{bc}$ | $0.162 \pm 0.004\text{a}$ |
| $g_{ias}$ ( $\text{mol m}^{-2} \text{s}^{-1}$ )           | $0.466 \pm 0.028\text{b}$ | $0.419 \pm 0.060\text{b}$ | $0.780 \pm 0.057\text{a}$  | $1.029 \pm 0.089\text{a}$ |
| $g_{liq}$ ( $\text{mol m}^{-2} \text{s}^{-1}$ )           | $0.117 \pm 0.006\text{b}$ | $0.170 \pm 0.013\text{a}$ | $0.125 \pm 0.005\text{b}$  | $0.163 \pm 0.007\text{a}$ |
| $S_{mes}/S$ ( $\text{m}^2 \text{m}^{-2}$ )                | $6.3 \pm 0.30\text{b}$    | $9.2 \pm 0.72\text{a}$    | $6.8 \pm 0.29\text{b}$     | $8.8 \pm 0.36\text{a}$    |

Values are means  $\pm$  s.e.m (n=4). Values followed by the same letter in each row were not significantly different by Tukey test at 5% probability.

**Table 4.** Plant morphological parameters evaluated 40 days after germination (dag) in heterobaric (Micro-Tom, MT) and homobaric (*obscuravenosa*, *obv*) tomatoes grown in two irradiance levels (sun/shade, 900/300  $\mu\text{mol photons m}^{-2} \text{s}^{-1}$ ).

|                                         | Sun               |                   | Shade             |                   |
|-----------------------------------------|-------------------|-------------------|-------------------|-------------------|
|                                         | MT                | <i>obv</i>        | MT                | <i>obv</i>        |
| Plant height (cm)                       | 9.90 $\pm$ 0.30a  | 10.53 $\pm$ 0.28a | 10.15 $\pm$ 0.62a | 10.63 $\pm$ 0.18a |
| Leaves to 1 <sup>st</sup> inflorescence | 6.75 $\pm$ 0.25a  | 6.50 $\pm$ 0.18a  | 6.62 $\pm$ 0.18a  | 6.75 $\pm$ 0.25a  |
| Leaf insertion angle (°)                | 82.8 $\pm$ 2.32a  | 73.1 $\pm$ 3.50b  | 81.8 $\pm$ 4.30a  | 65.5 $\pm$ 3.72b  |
| Stem diameter (cm)                      | 0.40 $\pm$ 0.02a  | 0.38 $\pm$ 0.03a  | 0.28 $\pm$ 0.01b  | 0.28 $\pm$ 0.01b  |
| <i>Dry weight (g)</i>                   |                   |                   |                   |                   |
| Leaves                                  | 1.30 $\pm$ 0.17a  | 1.35 $\pm$ 0.06a  | 1.07 $\pm$ 0.11a  | 1.05 $\pm$ 0.08a  |
| Stem                                    | 2.17 $\pm$ 0.14ab | 2.49 $\pm$ 0.19ab | 1.54 $\pm$ 0.18b  | 1.72 $\pm$ 0.07a  |
| Roots                                   | 0.80 $\pm$ 0.06a  | 0.80 $\pm$ 0.04a  | 0.50 $\pm$ 0.03b  | 0.43 $\pm$ 0.04b  |
| Total                                   | 4.28 $\pm$ 0.34ab | 4.65 $\pm$ 0.28a  | 3.12 $\pm$ 0.32b  | 3.21 $\pm$ 0.14b  |

915 Dry weight was determined through destructive analysis in plants 65 dag (n = 5). Values are means  $\pm$  s.e.m (n=6).  
 916 Values followed by the same letter were not significantly different by Tukey test at 5% probability.

917

918

919

920

921

922

923

924

925

926

927

928

929 **Figure legends**

930

931 **Fig. 1.** Leaf anatomical differences between Micro-Tom (MT) and the *obscuravenosa* (*obv*) mutant. (a) Semi-  
932 schematic representation of cross-sectional anatomy of a wild-type (MT) secondary vein. BSE= bundle sheath  
933 extension. (b) Representative images of terminal leaflets from fully expanded leaves infiltrated with 1% fuchsin acid  
934 solution applying 0.027 MPa of pressure during 2 minutes showing dry patches (arrowheads) in MT, as opposed to  
935 uniform infiltration in *obv*. Scale bar=1 cm. Bars are mean values  $\pm$  s.e.m. (n=4). Asterisk indicates significant  
936 difference by Student's t-test ( $P < 0.05$ ) (c) Chlorophyll fluorescence showing interruption of the palisade mesophyll  
937 on the adaxial side, and of the spongy mesophyll on the abaxial side by BSE cells in MT, which are absent in *obv*  
938 (d). (e-h) Cross-sections of the leaf lamina at the midrib (e,f) and a secondary vein (g,h) show the presence (MT) and  
939 absence (*obv*) of bundle sheath extensions (BSEs). The BSEs have a columnar nature protruding toward the adaxial  
940 epidermis (arrowheads), with thickened cells walls, whereas they thicken downward and are broadly based upon the  
941 lower epidermis. Scale bars= 1 cm (leaflets) and 100  $\mu$ m (midrib and secondary vein).

942

943 **Fig. 2.** Irradiance level differentially alters morphology in heterobaric and homobaric leaves. (a) Principal  
944 Component Analysis (PCA) on A and D harmonic coefficients from an Elliptical Fourier Descriptor (EFD) analysis  
945 shows distinct symmetric shape differences between MT and *obv* leaflets, but small differences due to light  
946 treatment. 95% confidence ellipses are provided for each genotype and light treatment combination, indicated by  
947 color. (b) Mean leaflet shapes for MT and *obv* in each light treatment. Mean leaflet shapes are superimposed for  
948 comparison. Note the wider *obv* leaflet compared to MT. MT shade, red; MT sun, green; *obv* shade, blue; *obv* sun,  
949 purple. (c) Specific leaf area (SLA); (d-e) relationship between perimeter/area and perimeter<sup>2</sup>/area. Bars are mean  
950 values  $\pm$  s.e.m. (n=5). Different letters indicate significant differences by Tukey's test at 5% probability.

951

952 **Fig. 3.** (a) Representative terminal leaflets of tomato cv Micro-Tom (MT, heterobaric) and the *obscuravenosa*  
953 mutant (*obv*, homobaric) leaves, showing translucent and dark veins, respectively. Bar=1cm. (b) Leaf hydraulic  
954 conductance ( $K_{\text{leaf}}$ ) in homobaric and heterobaric leaves grown in either sun or shade conditions. Bars are mean  
955 values  $\pm$  s.e.m. (n=3). Different letters indicate significant differences by Tukey's test at 5% probability. (c)  
956 Representative F1 plants and (b) terminal leaflets of Micro-Tom  $\times$  M82 (M82, heterobaric) and Micro-Tom *obv*  $\times$   
957 M82 (*obv*, homobaric). Scale bars= 10 cm (c) and 1 cm (d). (e)  $K_{\text{leaf}}$  in F1 plants of M82  $\times$  MT (M82, heterobaric)  
958 and F1 plants of M82  $\times$  MT-*obv*, (*obv*, homobaric) leaves from plants grown in either sun or shade conditions. Bars  
959 are mean values  $\pm$  s.e.m. (n=5). Different letters indicate significant differences by Tukey's ( $P < 0.05$ ).

960

961 **Fig. 4.** Homobaric leaves maintain lower stomatal conductance in both sun and shade conditions. Relationship  
962 between photosynthetic CO<sub>2</sub> assimilation rate ( $A$ ) and stomatal conductance ( $g_s$ ) for Micro-Tom (MT) and the  
963 *obscuravenosa* (*obv*) mutant plants grown in the sun (a) or shade (b). A rectangular hyperbolic function was fitted in  
964 each panel. Each point corresponds to an individual measurement carried out at common conditions in the leaf  
965 chamber: photon flux density (1000  $\mu$ mol m<sup>-2</sup> s<sup>-1</sup>, from an LED source), leaf temperature ( $25 \pm 0.5^\circ\text{C}$ ), leaf-to-air  
966 vapor pressure difference ( $16.0 \pm 3.0$  mbar), air flow rate into the chamber (500  $\mu$ mol s<sup>-1</sup>) and reference CO<sub>2</sub>  
967 concentration of 400 ppm (injected from a cartridge). (c-f) Stomatal traits are differentially affected by irradiance in  
968 heterobaric and homobaric tomato leaves. (a) SPI: stomatal pore area index, calculated as (guard cell length)<sup>2</sup>  $\times$   
969 stomatal density for the adaxial and abaxial epidermes and then added up; (b) Guard cell length; (c-d) Stomatal  
970 density (number of stomata per unit leaf area); Data shown as means  $\pm$  s.e.m. (n=6). Different letters indicate  
971 significant differences by Tukey's test at 5% probability.

972

973 **Fig. 5.** Irradiance level differentially alters leaf anatomical parameters in heterobaric and homobaric leaves. (a)  
974 Representative cross-sections of tomato cv Micro-Tom (MT, heterobaric) and the *obscuravenosa* mutant (*obv*,  
975 homobaric) leaves from plants grown in either sun or shade. The background was removed for clarity. PP: palisade  
976 parenchyma; SP: spongy parenchyma; IAS: intercellular air spaces; AE: abaxial epidermis. (b) Representative plates  
977 showing the pattern and density of minor veins in 7.8 mm<sup>2</sup> sections in mature, cleared leaves. Scale bar=200  $\mu$ m. (c-

978 g) Histograms with mean values  $\pm$  s.e.m. (n=6) for the ratio between palisade and spongy parenchyma thickness;  
979 thickness of the abaxial epidermis; the proportion of intercellular air spaces and the density of minor (quaternary and  
980 higher order) veins measured in cleared sections of the leaves and lamina thickness. Different letters indicate  
981 significant differences by Tukey's test at 5% probability.

982

983 **Fig. 6.** Reaction norms of structural and physiological traits in relation to leaf thickness in two irradiance levels in  
984 homobaric and heterobaric leaves. (a) light-saturated photosynthetic assimilation rate (A); (b) proportion of  
985 intercellular air spaces in the lamina, (c) minor vein per unit leaf area (VLA) and (d) stomatal pore area index  
986 (adimensional). The values of the slopes are shown next to each line.

987

988

989

### 990 **Supplemental Information**

991 **Fig S1.** Photosynthetic light response curves in heterobaric and homobaric cv. MT plants.

992 **Fig S2.** Transpiration efficiency in heterobaric and homobaric plants in the tomato cv. M82  
993 background grown in the sun and shade.

994 **Fig S3.** Stomatal traits in heterobaric and homobaric cv. MT plants grown in the sun and in the  
995 shade.

996 **Fig S4.** Detail of mesophyll anatomy in leaves of sun- and shade-grown homobaric and  
997 heterobaric cv. MT plants.

998 **Fig S5.** Carbon isotope composition changes in response to irradiance in heterobaric and  
999 homobaric cv. MT plants.

1000 **Fig S6.** Side branching ratio in MT and *obv* plants grown in the sun and shade.

1001

1002 **Table S1.** Photosynthetic parameters from light response curves in MT and *obv* grown in sun  
1003 and shade

1004 **Table S2.** Chlorophyll fluorescence analyses in MT and *obv* grown in sun and shade.

1005 **Table S3.** Carbon isotope composition in MT and *obv* grown in sun and shade.

1006 **Table S4.** Leaf carbohydrate and pigment content in MT and *obv* grown in sun and shade.

1007 **Table S5.** Agronomic parameters (yield and Brix) in homobaric and heterobaric plants of tomato  
1008 cultivars MT and M82 grown in the sun and shade.

1009

1010 **Table S6.** Gas exchange parameters determined in fully-expanded leaves of heterobaric (Micro-  
1011 Tom, MT) and homobaric (*obscuravenosa*, *obv*) in two irradiance levels (sun/shade, 900/300  
1012  $\mu\text{mol photons m}^{-2} \text{s}^{-1}$ ).

1013

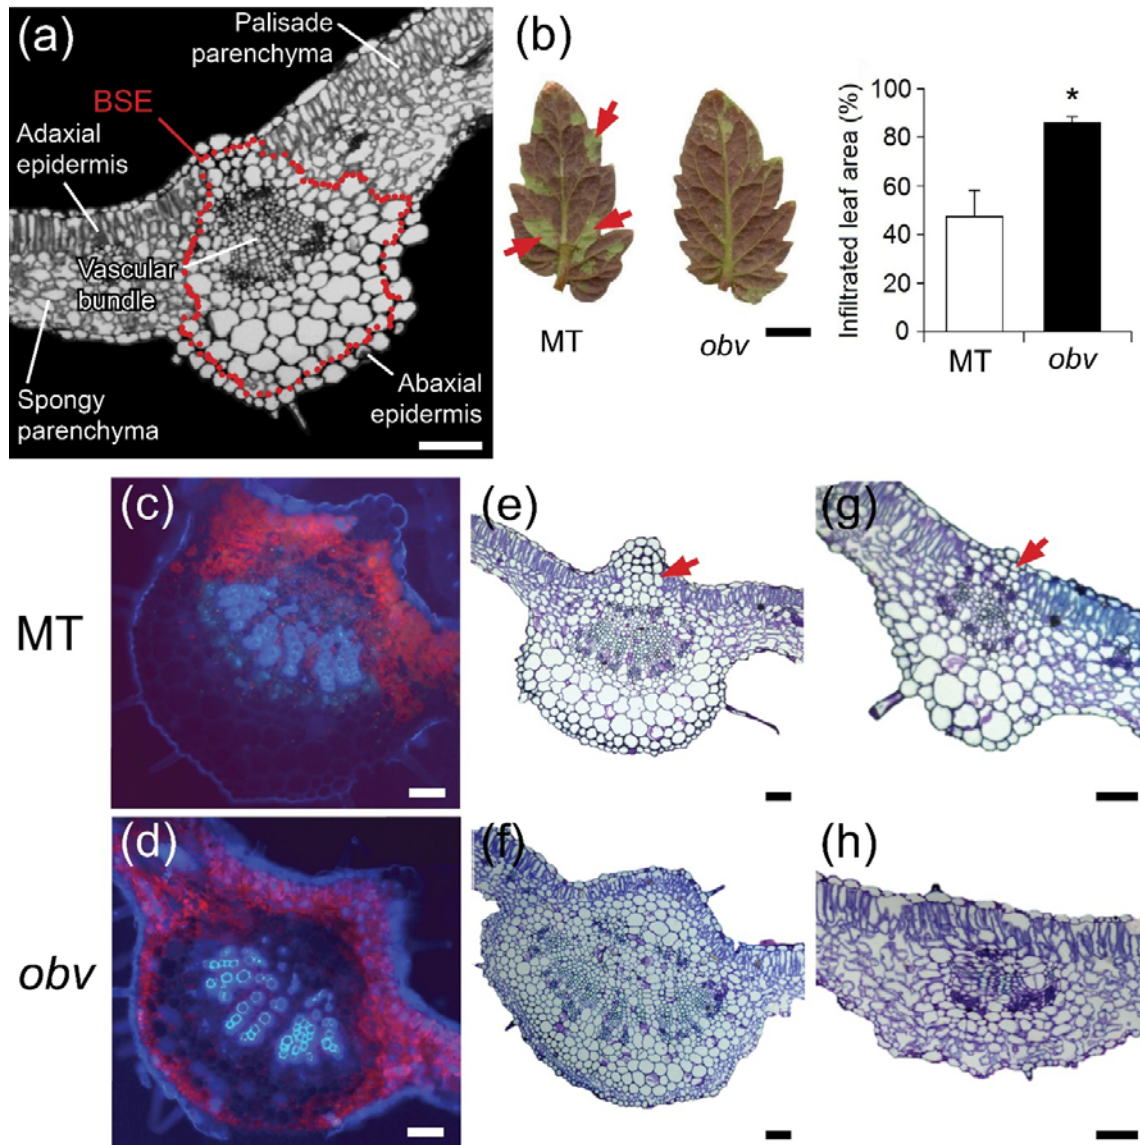

**Figure 1.** Leaf anatomical differences between Micro-Tom (MT) and the *obscuravenosa* (*obv*) mutant. (a) Semi-schematic representation of cross-sectional anatomy of a wild-type (MT) secondary vein. BSE= bundle sheath extension. (b) Representative images of terminal leaflets from fully expanded leaves infiltrated with 1% fuchsin acid solution applying 0.027 MPa of pressure during 2 minutes showing dry patches (arrowheads) in MT, as opposed to uniform infiltration in *obv*. Scale bar=1 cm. Bars are mean values  $\pm$  s.e.m. (n=4). Asterisk indicates significant difference by Student's t-test ( $P < 0.05$ ) (c) Chlorophyll fluorescence showing interruption of the palisade mesophyll on the adaxial side, and of the spongy mesophyll on the abaxial side by BSE cells in MT, which are absent in *obv* (d). (e-h) Cross-sections of the leaf lamina at the midrib (e,f) and a secondary vein (g,h) show the presence (MT) and absence (*obv*) of bundle sheath extensions (BSEs). The BSEs have a columnar nature protruding toward the adaxial epidermis (arrowheads), with thickened cells walls, whereas they thicken downward and are broadly based upon the lower epidermis. Scale bars= 1 cm (leaflets) and 100  $\mu$ m (midrib and secondary vein).

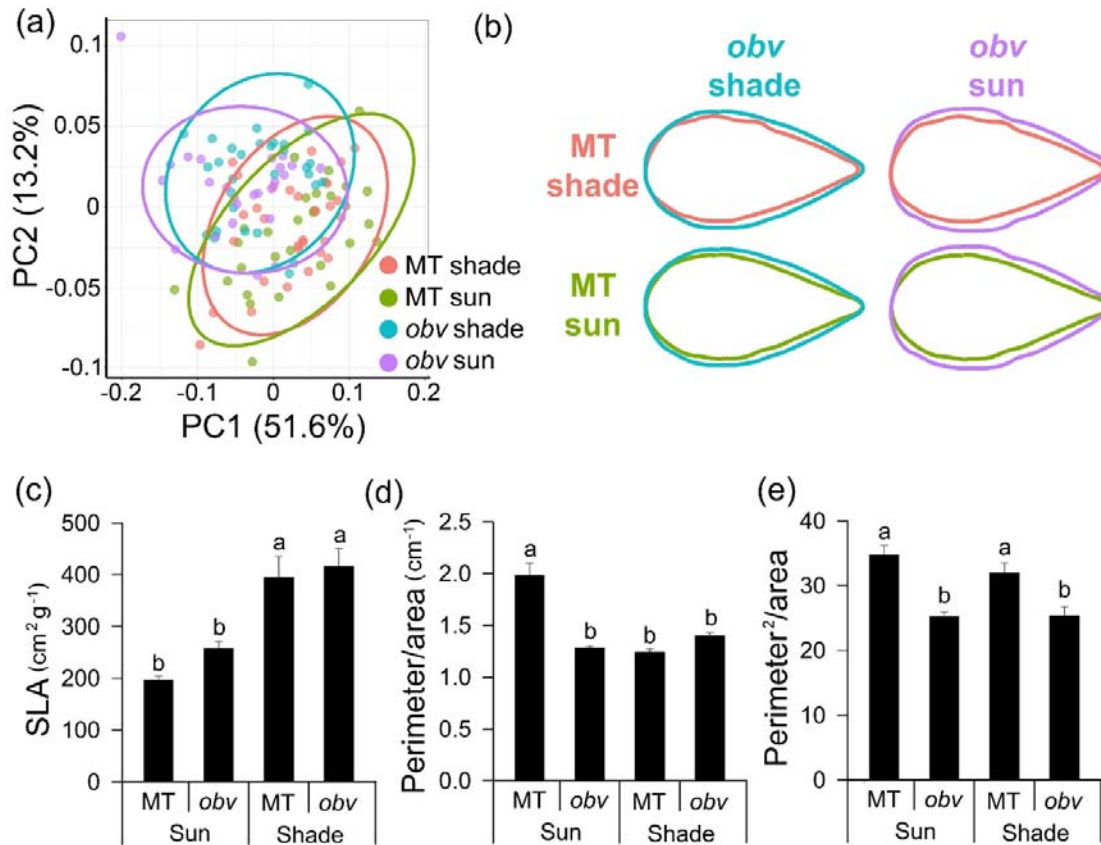

**Fig. 2.** Irradiance level differentially alters morphology in heterobaric and homobaric leaves. (a) Principal Component Analysis (PCA) on A and D harmonic coefficients from an Elliptical Fourier Descriptor (EFD) analysis shows distinct symmetric shape differences between MT and *obv* leaflets, but small differences due to light treatment. 95% confidence ellipses are provided for each genotype and light treatment combination, indicated by color. (b) Mean leaflet shapes for MT and *obv* in each light treatment. Mean leaflet shapes are superimposed for comparison. Note the wider *obv* leaflet compared to MT. MT shade, red; MT sun, green; *obv* shade, blue; *obv* sun, purple. (c) Specific leaf area (SLA); (d-e) relationship between perimeter/area and perimeter<sup>2</sup>/area. Bars are mean values  $\pm$  s.e.m. (n=5). Different letters indicate significant differences by Tukey's test at 5% probability.



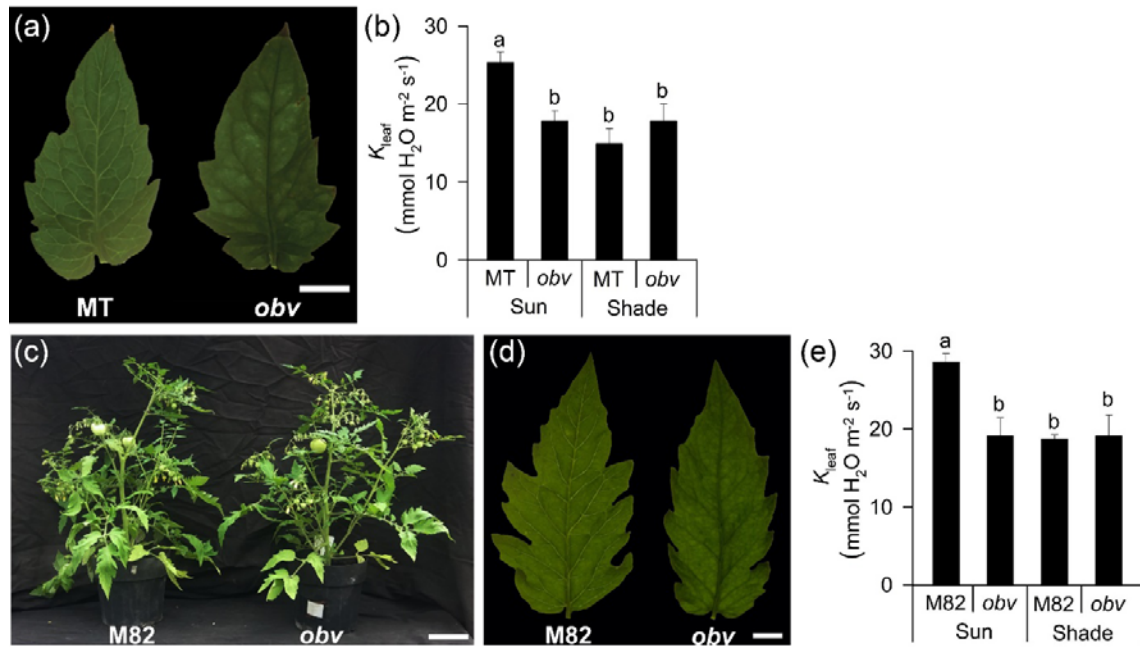

**Figure 3.** (a) Representative terminal leaflets of tomato cv Micro-Tom (MT, heterobaric) and the *obscuravenosa* mutant (*obv*, homobaric) leaves, showing translucent and dark veins, respectively. Bar=1cm. (b) Leaf hydraulic conductance ( $K_{\text{leaf}}$ ) in homobaric and heterobaric leaves grown in either sun or shade conditions. Bars are mean values  $\pm$  s.e.m. (n=3). Different letters indicate significant differences by Tukey's test at 5% probability. (c) Representative F1 plants and (b) terminal leaflets of Micro-Tom  $\times$  M82 (M82, heterobaric) and Micro-Tom *obv*  $\times$  M82 (*obv*, homobaric). Scale bars= 10 cm (c) and 1 cm (d). (e)  $K_{\text{leaf}}$  in F<sub>1</sub> plants of M82  $\times$  MT (M82, heterobaric) and F<sub>1</sub> plants of M82  $\times$  MT-*obv*, (*obv*, homobaric) leaves from plants grown in either sun or shade conditions. Bars are mean values  $\pm$  s.e.m. (n=5). Different letters indicate significant differences by Tukey's ( $P < 0.05$ ).

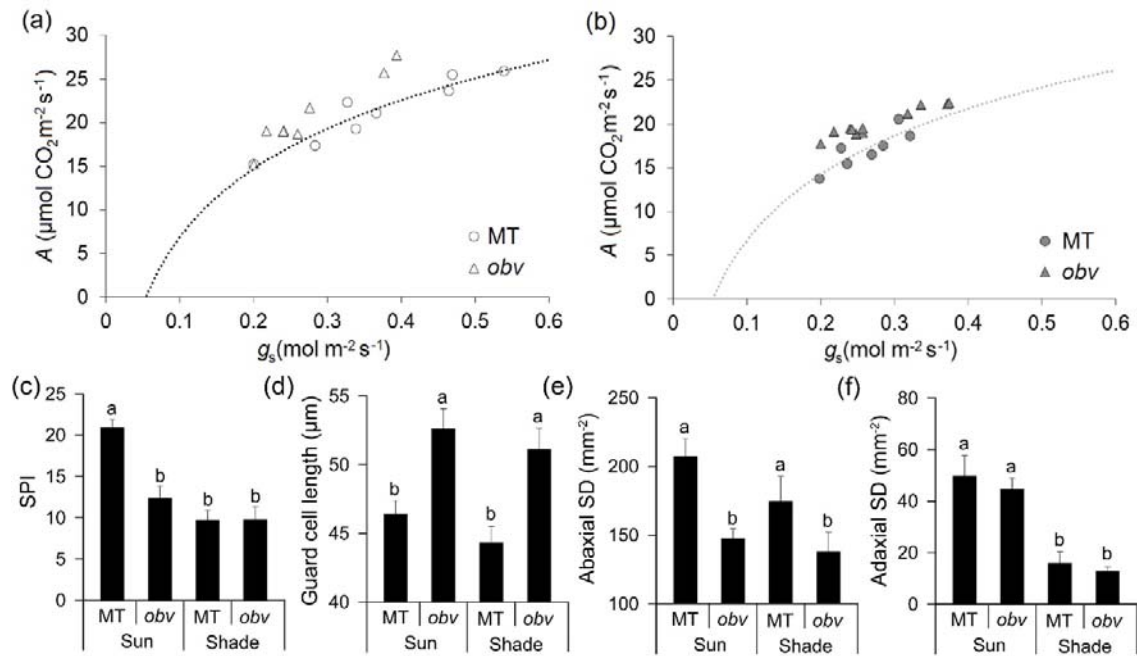

**Fig. 4.** Homobaric leaves maintain lower stomatal conductance in both sun and shade conditions. Relationship between photosynthetic CO<sub>2</sub> assimilation rate (*A*) and stomatal conductance (*g<sub>s</sub>*) for Micro-Tom (MT) and the *obscuravenosa* (*obv*) mutant plants grown in the sun (a) or shade (b). A rectangular hyperbolic function was fitted in each panel. Each point corresponds to an individual measurement carried out at common conditions in the leaf chamber: photon flux density (1000 μmol m<sup>-2</sup> s<sup>-1</sup>, from an LED source), leaf temperature (25 ± 0.5°C), leaf-to-air vapor pressure difference (16.0 ± 3.0 mbar), air flow rate into the chamber (500 μmol s<sup>-1</sup>) and reference CO<sub>2</sub> concentration of 400 ppm (injected from a cartridge). (c-f) Stomatal traits are differentially affected by irradiance in heterobaric and homobaric tomato leaves. (a) SPI: stomatal pore area index, calculated as (guard cell length)<sup>2</sup> × stomatal density for the adaxial and abaxial epidermes and then added up; (b) Guard cell length; (c-d) Stomatal density (number of stomata per unit leaf area); Data shown as means ± s.e.m. (n=6). Different letters indicate significant differences by Tukey's test at 5% probability.

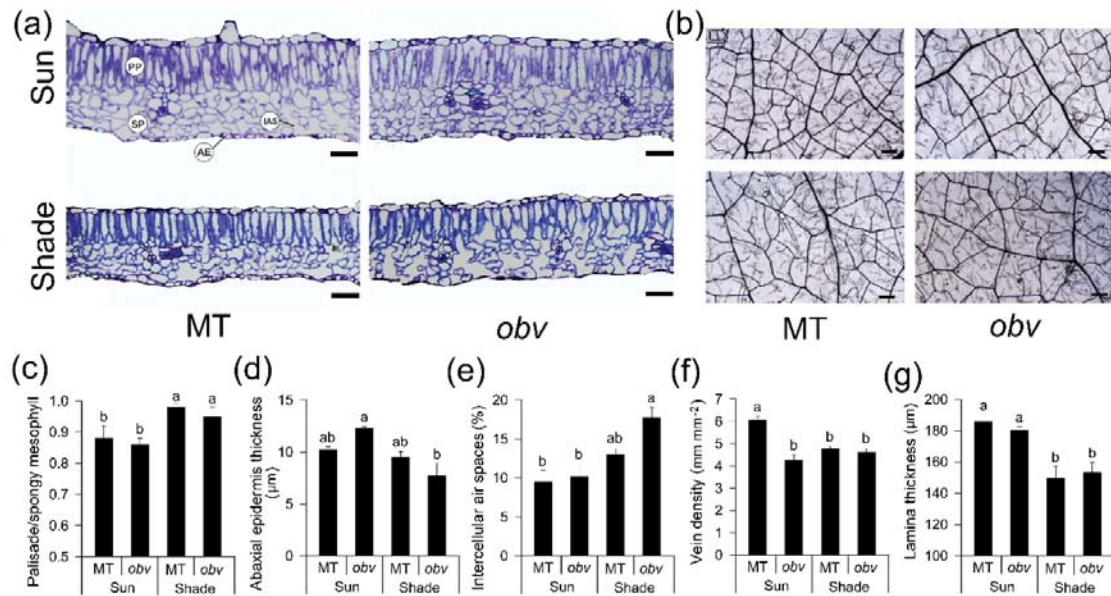

**Fig. 5.** Irradiance level differentially alters leaf anatomical parameters in heterobaric and homobaric leaves. (a) Representative cross-sections of tomato cv Micro-Tom (MT, heterobaric) and the *obscuravenosa* mutant (*obv*, homobaric) leaves from plants grown in either sun or shade. The background was removed for clarity. PP: palisade parenchyma; SP: spongy parenchyma; IAS: intercellular air spaces; AE: abaxial epidermis. Scale bars=50 μm (b) Representative plates showing the pattern and density of minor veins in 7.8 mm<sup>2</sup> sections in mature, cleared leaves. Scale bars=200 μm. (c-g) Histograms with mean values ± s.e.m. (n=6) for the ratio between palisade and spongy parenchyma thickness; thickness of the abaxial epidermis; the proportion of intercellular air spaces and the density of minor (quaternary and higher order) veins measured in cleared sections of the leaves and lamina thickness. Different letters indicate significant differences by Tukey's test at 5% probability.

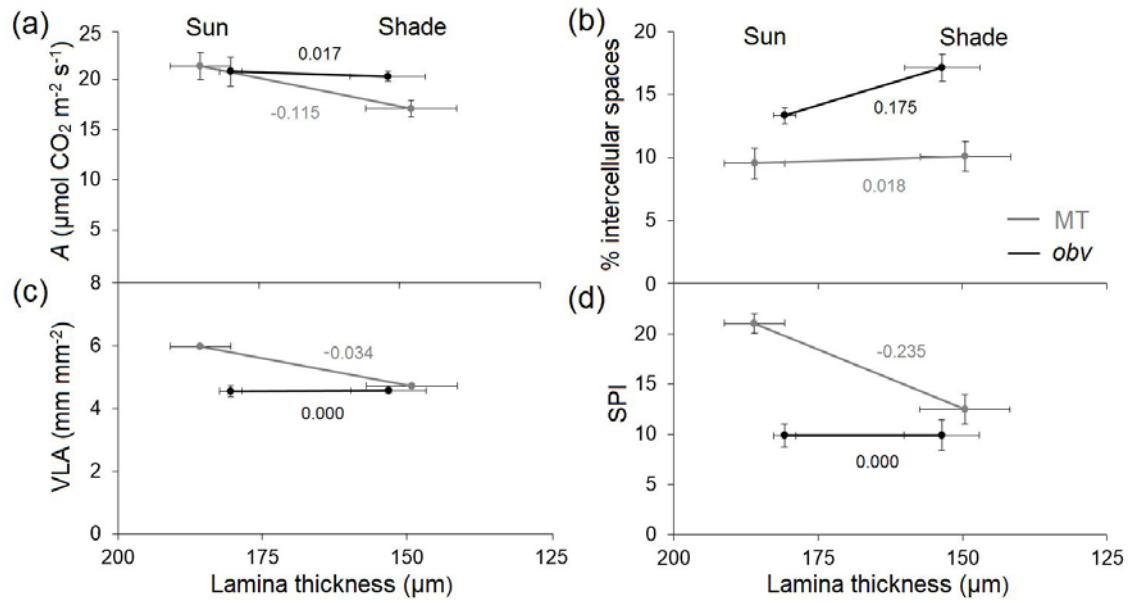

**Fig. 6.** Reaction norms of structural and physiological traits in relation to leaf thickness in two irradiance levels in homobaric and heterobaric leaves. (a) light-saturated photosynthetic assimilation rate ( $A$ ); (b) proportion of intercellular air spaces in the lamina, (c) minor vein per unit leaf area (VLA) and (d) stomatal pore area index (adimensional). The values of the slopes are shown next to each line. Error bars are s.e.m.
